# Supplementary material for: Species-specific genes under selection characterize the co-evolution of slavemaker and host lifestyles
Source: BMC Evol Biol. 2017 Dec 4;17:237. doi: 10.1186/s12862-017-1078-9 (PMC5715652; doi:10.1186/s12862-017-1078-9)
Supplement: Supplementary file 6 — Summary shared selected genes between slavemaker-host species pairs. (XLSX 39 kb) [file 12862_2017_1078_MOESM6_ESM.xlsx]

## Sheet: summary
slavemaker	host	only in slavemaker	only in host	shared
T.americanus	T. longispinosus	207	35	4
	T. curvispinosus	208	65	3
	T. ambiguus	205	39	6
T. duloticus	T. longispinosus	52	34	5
	T. curvispinosus	57	68	0
	T. ambiguus	56	44	1
T. pilagens	T. longispinosus	38	39	0
	T. curvispinosus	36	66	2
	T. ambiguus	37	44	1

## Sheet: ameri-longi
gi|607364554|gb|EZA58766.1| Leukotriene A-4 hydrolase [Cerapachys biroi]				35 elements included exclusively in "List 2":						4 common elements in "List 1" and "List 2":
gi|307176323|gb|EFN65942.1| Afadin [Camponotus floridanus]				gi|307176323|gb|EFN65942.1| Afadin [Camponotus floridanus]	gi|307176323|gb|EFN65942.1| Afadin [Camponotus floridanus]					gi|607364554|gb|EZA58766.1| Leukotriene A-4 hydrolase [Cerapachys biroi]
gi|332023970|gb|EGI64188.1| hypothetical protein G5I_07348 [Acromyrmex echinatior]				gi|332025498|gb|EGI65661.1| Cytoskeleton-associated protein 5 [Acromyrmex echinatior]	gi|332025498|gb|EGI65661.1| Cytoskeleton-associated protein 5 [Acromyrmex echinatior]					gi|332023970|gb|EGI64188.1| hypothetical protein G5I_07348 [Acromyrmex echinatior]
gi|332025498|gb|EGI65661.1| Cytoskeleton-associated protein 5 [Acromyrmex echinatior]				gi|322786591|gb|EFZ12986.1| hypothetical protein SINV_04324 [Solenopsis invicta]	gi|322786591|gb|EFZ12986.1| hypothetical protein SINV_04324 [Solenopsis invicta]					gi|332027618|gb|EGI67688.1| DNA-binding protein RFX7 [Acromyrmex echinatior]
gi|322786591|gb|EFZ12986.1| hypothetical protein SINV_04324 [Solenopsis invicta]				gi|350408136|ref|XP_003488316.1| PREDICTED: beta-amyloid-like protein-like [Bombus impatiens]	gi|350408136|ref|XP_003488316.1| PREDICTED: beta-amyloid-like protein-like [Bombus impatiens]					gi|307183173|gb|EFN70082.1| Nucleoprotein TPR [Camponotus floridanus]
gi|350408136|ref|XP_003488316.1| PREDICTED: beta-amyloid-like protein-like [Bombus impatiens]				gi|332023742|gb|EGI63966.1| Actin-binding LIM protein 1 [Acromyrmex echinatior]	gi|332023742|gb|EGI63966.1| Actin-binding LIM protein 1 [Acromyrmex echinatior]
gi|332023742|gb|EGI63966.1| Actin-binding LIM protein 1 [Acromyrmex echinatior]				gi|322778729|gb|EFZ09145.1| hypothetical protein SINV_01483 [Solenopsis invicta]	gi|322778729|gb|EFZ09145.1| hypothetical protein SINV_01483 [Solenopsis invicta]
gi|322778729|gb|EFZ09145.1| hypothetical protein SINV_01483 [Solenopsis invicta]				gi|322778999|gb|EFZ09403.1| hypothetical protein SINV_02780 [Solenopsis invicta]	gi|322778999|gb|EFZ09403.1| hypothetical protein SINV_02780 [Solenopsis invicta]
gi|322778999|gb|EFZ09403.1| hypothetical protein SINV_02780 [Solenopsis invicta]				gi|332022728|gb|EGI63004.1| Zinc finger protein 91 [Acromyrmex echinatior]	gi|332022728|gb|EGI63004.1| Zinc finger protein 91 [Acromyrmex echinatior]
gi|332022728|gb|EGI63004.1| Zinc finger protein 91 [Acromyrmex echinatior]				gi|332017838|gb|EGI58498.1| 3-hydroxy-3-methylglutaryl-coenzyme A reductase [Acromyrmex echinatior]	gi|332017838|gb|EGI58498.1| 3-hydroxy-3-methylglutaryl-coenzyme A reductase [Acromyrmex echinatior]
gi|332017838|gb|EGI58498.1| 3-hydroxy-3-methylglutaryl-coenzyme A reductase [Acromyrmex echinatior]				gi|307166565|gb|EFN60628.1| hypothetical protein EAG_05356 [Camponotus floridanus]	gi|307166565|gb|EFN60628.1| hypothetical protein EAG_05356 [Camponotus floridanus]
gi|307166565|gb|EFN60628.1| hypothetical protein EAG_05356 [Camponotus floridanus]				gi|307191532|gb|EFN75035.1| Glutaminase kidney isoform, mitochondrial [Camponotus floridanus]	gi|307191532|gb|EFN75035.1| Glutaminase kidney isoform, mitochondrial [Camponotus floridanus]
gi|307191532|gb|EFN75035.1| Glutaminase kidney isoform, mitochondrial [Camponotus floridanus]				gi|322797458|gb|EFZ19529.1| hypothetical protein SINV_05269 [Solenopsis invicta]	gi|322797458|gb|EFZ19529.1| hypothetical protein SINV_05269 [Solenopsis invicta]
gi|322797458|gb|EFZ19529.1| hypothetical protein SINV_05269 [Solenopsis invicta]				gi|322802442|gb|EFZ22792.1| hypothetical protein SINV_08137 [Solenopsis invicta]	gi|322802442|gb|EFZ22792.1| hypothetical protein SINV_08137 [Solenopsis invicta]
gi|322802442|gb|EFZ22792.1| hypothetical protein SINV_08137 [Solenopsis invicta]				gi|332030934|gb|EGI70560.1| Glutamyl aminopeptidase [Acromyrmex echinatior]	gi|332030934|gb|EGI70560.1| Glutamyl aminopeptidase [Acromyrmex echinatior]
gi|332030934|gb|EGI70560.1| Glutamyl aminopeptidase [Acromyrmex echinatior]				gi|307200373|gb|EFN80616.1| RAB6IP1-like protein [Harpegnathos saltator]	gi|307200373|gb|EFN80616.1| RAB6IP1-like protein [Harpegnathos saltator]
gi|332027618|gb|EGI67688.1| DNA-binding protein RFX7 [Acromyrmex echinatior]				gi|572299478|ref|XP_006615869.1| PREDICTED: amphiphysin-like isoform X4 [Apis dorsata]	gi|572299478|ref|XP_006615869.1| PREDICTED: amphiphysin-like isoform X4 [Apis dorsata]
gi|307200373|gb|EFN80616.1| RAB6IP1-like protein [Harpegnathos saltator]				gi|332019825|gb|EGI60286.1| hypothetical protein G5I_11468 [Acromyrmex echinatior]	gi|332019825|gb|EGI60286.1| hypothetical protein G5I_11468 [Acromyrmex echinatior]
gi|572299478|ref|XP_006615869.1| PREDICTED: amphiphysin-like isoform X4 [Apis dorsata]				gi|332030506|gb|EGI70194.1| Thioredoxin reductase 1, mitochondrial [Acromyrmex echinatior]	gi|332030506|gb|EGI70194.1| Thioredoxin reductase 1, mitochondrial [Acromyrmex echinatior]
gi|332019825|gb|EGI60286.1| hypothetical protein G5I_11468 [Acromyrmex echinatior]				gi|332018469|gb|EGI59059.1| Esterase FE4 [Acromyrmex echinatior]	gi|332018469|gb|EGI59059.1| Esterase FE4 [Acromyrmex echinatior]
gi|332030506|gb|EGI70194.1| Thioredoxin reductase 1, mitochondrial [Acromyrmex echinatior]				gi|332026456|gb|EGI66584.1| Transcription initiation factor TFIID subunit 4 [Acromyrmex echinatior]	gi|332026456|gb|EGI66584.1| Transcription initiation factor TFIID subunit 4 [Acromyrmex echinatior]
gi|332018469|gb|EGI59059.1| Esterase FE4 [Acromyrmex echinatior]				gi|332028329|gb|EGI68376.1| T-box protein 2 [Acromyrmex echinatior]	gi|332028329|gb|EGI68376.1| T-box protein 2 [Acromyrmex echinatior]
gi|332026456|gb|EGI66584.1| Transcription initiation factor TFIID subunit 4 [Acromyrmex echinatior]				gi|332019281|gb|EGI59790.1| Mitogen-activated protein kinase kinase kinase 12 [Acromyrmex echinatior]	gi|332019281|gb|EGI59790.1| Mitogen-activated protein kinase kinase kinase 12 [Acromyrmex echinatior]
gi|332028329|gb|EGI68376.1| T-box protein 2 [Acromyrmex echinatior]				gi|332021632|gb|EGI61991.1| Small subunit processome component 20-like protein [Acromyrmex echinatior]	gi|332021632|gb|EGI61991.1| Small subunit processome component 20-like protein [Acromyrmex echinatior]
gi|332019281|gb|EGI59790.1| Mitogen-activated protein kinase kinase kinase 12 [Acromyrmex echinatior]				gi|332029699|gb|EGI69578.1| Intraflagellar transport protein 140-like protein [Acromyrmex echinatior]	gi|332029699|gb|EGI69578.1| Intraflagellar transport protein 140-like protein [Acromyrmex echinatior]
gi|332021632|gb|EGI61991.1| Small subunit processome component 20-like protein [Acromyrmex echinatior]				gi|332022845|gb|EGI63118.1| U3 small nucleolar RNA-associated protein 15-like protein [Acromyrmex echinatior]	gi|332022845|gb|EGI63118.1| U3 small nucleolar RNA-associated protein 15-like protein [Acromyrmex echinatior]
gi|307183173|gb|EFN70082.1| Nucleoprotein TPR [Camponotus floridanus]				gi|322802768|gb|EFZ22980.1| hypothetical protein SINV_06819 [Solenopsis invicta]	gi|322802768|gb|EFZ22980.1| hypothetical protein SINV_06819 [Solenopsis invicta]
gi|332029699|gb|EGI69578.1| Intraflagellar transport protein 140-like protein [Acromyrmex echinatior]				gi|332023061|gb|EGI63326.1| Tuberin [Acromyrmex echinatior]	gi|332023061|gb|EGI63326.1| Tuberin [Acromyrmex echinatior]
gi|332022845|gb|EGI63118.1| U3 small nucleolar RNA-associated protein 15-like protein [Acromyrmex echinatior]				gi|332030691|gb|EGI70368.1| Adenomatous polyposis coli protein [Acromyrmex echinatior]	gi|332030691|gb|EGI70368.1| Adenomatous polyposis coli protein [Acromyrmex echinatior]
gi|322802768|gb|EFZ22980.1| hypothetical protein SINV_06819 [Solenopsis invicta]				gi|322778710|gb|EFZ09126.1| hypothetical protein SINV_00178 [Solenopsis invicta]	gi|322778710|gb|EFZ09126.1| hypothetical protein SINV_00178 [Solenopsis invicta]
gi|332023061|gb|EGI63326.1| Tuberin [Acromyrmex echinatior]				gi|332024969|gb|EGI65156.1| Immunoglobulin superfamily member 10 [Acromyrmex echinatior]	gi|332024969|gb|EGI65156.1| Immunoglobulin superfamily member 10 [Acromyrmex echinatior]
gi|332030691|gb|EGI70368.1| Adenomatous polyposis coli protein [Acromyrmex echinatior]				gi|607359898|gb|EZA54251.1| Flotillin-1 [Cerapachys biroi]	gi|607359898|gb|EZA54251.1| Flotillin-1 [Cerapachys biroi]
gi|322778710|gb|EFZ09126.1| hypothetical protein SINV_00178 [Solenopsis invicta]				gi|332027430|gb|EGI67513.1| Zinc finger protein jing-like protein [Acromyrmex echinatior]	gi|332027430|gb|EGI67513.1| Zinc finger protein jing-like protein [Acromyrmex echinatior]
gi|332024969|gb|EGI65156.1| Immunoglobulin superfamily member 10 [Acromyrmex echinatior]				gi|607361944|gb|EZA56205.1| Trypsin-1 [Cerapachys biroi]	gi|607361944|gb|EZA56205.1| Trypsin-1 [Cerapachys biroi]
gi|607359898|gb|EZA54251.1| Flotillin-1 [Cerapachys biroi]				gi|322787067|gb|EFZ13291.1| hypothetical protein SINV_14462 [Solenopsis invicta]	gi|322787067|gb|EFZ13291.1| hypothetical protein SINV_14462 [Solenopsis invicta]
gi|332027430|gb|EGI67513.1| Zinc finger protein jing-like protein [Acromyrmex echinatior]				gi|576938482|dbj|BAO48212.1| Kazal-type proteinase inhibitor [Camponotus japonicus]	gi|576938482|dbj|BAO48212.1| Kazal-type proteinase inhibitor [Camponotus japonicus]
gi|607361944|gb|EZA56205.1| Trypsin-1 [Cerapachys biroi]
gi|322787067|gb|EFZ13291.1| hypothetical protein SINV_14462 [Solenopsis invicta]
gi|576938482|dbj|BAO48212.1| Kazal-type proteinase inhibitor [Camponotus japonicus]
all6-vs-all610001303
all6-vs-all610001433
all6-vs-all610001436
all6-vs-all610001447
all6-vs-all610001448
all6-vs-all610001454
all6-vs-all610001491
all6-vs-all610001497
all6-vs-all610001567
all6-vs-all610001580
all6-vs-all610001635
all6-vs-all610001695
all6-vs-all610001755
all6-vs-all610001765
all6-vs-all610001766
all6-vs-all610001810
all6-vs-all610001813
all6-vs-all610001817
all6-vs-all610001828
all6-vs-all610001867
all6-vs-all610001882
all6-vs-all610001896
all6-vs-all610001900
all6-vs-all610001906
all6-vs-all610001943
all6-vs-all610001949
all6-vs-all610001977
all6-vs-all610002077
all6-vs-all610002116
all6-vs-all610002136
all6-vs-all610002140
all6-vs-all610002185
all6-vs-all610002193
all6-vs-all610002208
all6-vs-all610002230
all6-vs-all610002256
all6-vs-all610002259
all6-vs-all610002263
all6-vs-all610002264
all6-vs-all610002291
all6-vs-all610002387
all6-vs-all610002478
all6-vs-all610002568
all6-vs-all610002589
all6-vs-all610002602
all6-vs-all610002659
all6-vs-all610002670
all6-vs-all610002678
all6-vs-all610002692
all6-vs-all610002715
all6-vs-all610002717
all6-vs-all610002721
all6-vs-all610002739
all6-vs-all610002740
all6-vs-all610002751
all6-vs-all610002752
all6-vs-all610002753
all6-vs-all610002762
all6-vs-all610002766
all6-vs-all610002770
all6-vs-all610002785
all6-vs-all610002802
all6-vs-all610002806
all6-vs-all610002854
all6-vs-all610002948
all6-vs-all610002956
all6-vs-all610002959
all6-vs-all610002998
all6-vs-all610003005
all6-vs-all610003037
all6-vs-all610003040
all6-vs-all610003103
all6-vs-all610003105
all6-vs-all610003136
all6-vs-all610003168
all6-vs-all610003173
all6-vs-all610003186
all6-vs-all610003193
all6-vs-all610003235
all6-vs-all610003293
all6-vs-all610003305
all6-vs-all610003308
all6-vs-all610003347
all6-vs-all610003376
all6-vs-all610003443
all6-vs-all610003473
all6-vs-all610003477
all6-vs-all610003533
all6-vs-all610003545
all6-vs-all610003571
all6-vs-all610003578
all6-vs-all610003592
all6-vs-all610003593
all6-vs-all610003858
all6-vs-all610003893
all6-vs-all610003949
all6-vs-all610003952
all6-vs-all610003989
all6-vs-all610004094
all6-vs-all610004141
all6-vs-all610004214
all6-vs-all610004230
all6-vs-all610004245
all6-vs-all610004289
all6-vs-all610004295
all6-vs-all610004344
all6-vs-all610004403
all6-vs-all610004496
all6-vs-all610004532
all6-vs-all610004541
all6-vs-all610004552
all6-vs-all610004589
all6-vs-all610004618
all6-vs-all610004641
all6-vs-all610004696
all6-vs-all610004704
all6-vs-all610004708
all6-vs-all610004710
all6-vs-all610004718
all6-vs-all610004887
all6-vs-all610004895
all6-vs-all610005018
all6-vs-all610005024
all6-vs-all610005031
all6-vs-all610005038
all6-vs-all610005052
all6-vs-all610005057
all6-vs-all610005058
all6-vs-all610005077
all6-vs-all610005143
all6-vs-all610005160
all6-vs-all610005190
all6-vs-all610005298
all6-vs-all610006227
all6-vs-all610006315
all6-vs-all610006318
all6-vs-all610006427
all6-vs-all610006462
all6-vs-all610006506
all6-vs-all610006577
all6-vs-all610006580
all6-vs-all610006622
all6-vs-all610006650
all6-vs-all610006716
all6-vs-all610006730
all6-vs-all610006745
all6-vs-all610006805
all6-vs-all610006873
all6-vs-all610006955
all6-vs-all610006997
all6-vs-all610007021
all6-vs-all610007093
all6-vs-all610007134
all6-vs-all610007218
all6-vs-all610007279
all6-vs-all610007352
all6-vs-all610007369
all6-vs-all610007470
all6-vs-all610007516
all6-vs-all610007519
all6-vs-all610007539
all6-vs-all610007601
all6-vs-all610007739
all6-vs-all610007850
all6-vs-all610007881
all6-vs-all610007928
all6-vs-all610008116
all6-vs-all610008122
all6-vs-all610008153

## Sheet: dul-curvi
57 elements included exclusively in "T.dul":			68 elements included exclusively in "T.curvi":					0 common elements in "T.dul" and "T.curvi":
gi|322801079|gb|EFZ21832.1| hypothetical protein SINV_03497 [Solenopsis invicta]			gi|322798669|gb|EFZ20273.1| hypothetical protein SINV_16002 [Solenopsis invicta]
gi|332023970|gb|EGI64188.1| hypothetical protein G5I_07348 [Acromyrmex echinatior]			gi|322792674|gb|EFZ16548.1| hypothetical protein SINV_12348 [Solenopsis invicta]
gi|322792404|gb|EFZ16388.1| hypothetical protein SINV_11844 [Solenopsis invicta]			gi|332029741|gb|EGI69610.1| hypothetical protein G5I_01515 [Acromyrmex echinatior]
gi|571532890|ref|XP_006560791.1| PREDICTED: microtubule-associated protein futsch isoform X2 [Apis mellifera]			gi|332027647|gb|EGI67715.1| Autophagy-related protein 2-like protein B [Acromyrmex echinatior]
gi|332030215|gb|EGI69998.1| Alpha-catulin [Acromyrmex echinatior]			gi|332016543|gb|EGI57424.1| SEC14 domain and spectrin repeat-containing protein 1 [Acromyrmex echinatior]
gi|665811977|ref|XP_008554483.1| PREDICTED: casein kinase I isoform gamma-3 isoform X4 [Microplitis demolitor]			gi|307179768|gb|EFN67958.1| RB1-inducible coiled-coil protein 1 [Camponotus floridanus]
gi|322800185|gb|EFZ21270.1| hypothetical protein SINV_08341 [Solenopsis invicta]			gi|332018906|gb|EGI59452.1| hypothetical protein G5I_12358 [Acromyrmex echinatior]
gi|332019302|gb|EGI59810.1| Thyrotropin-releasing hormone-degrading ectoenzyme [Acromyrmex echinatior]			gi|322786168|gb|EFZ12773.1| hypothetical protein SINV_02726 [Solenopsis invicta]
gi|322786633|gb|EFZ13028.1| hypothetical protein SINV_80320 [Solenopsis invicta]			gi|607358496|gb|EZA52898.1| Epidermal growth factor receptor substrate 15-like protein [Cerapachys biroi]
gi|332028985|gb|EGI68999.1| Ferrochelatase, mitochondrial [Acromyrmex echinatior]			gi|332022486|gb|EGI62793.1| Paired amphipathic helix protein Sin3a [Acromyrmex echinatior]
gi|307176984|gb|EFN66290.1| Dosage compensation regulator [Camponotus floridanus]			gi|607356846|gb|EZA51338.1| Twinfilin [Cerapachys biroi]
gi|607356023|gb|EZA50569.1| SH3 domain-containing RING finger protein [Cerapachys biroi]			gi|607365268|gb|EZA59466.1| Phosphofurin acidic cluster sorting protein [Cerapachys biroi]
gi|332017838|gb|EGI58498.1| 3-hydroxy-3-methylglutaryl-coenzyme A reductase [Acromyrmex echinatior]			gi|607360805|gb|EZA55124.1| Unc-13-like protein D [Cerapachys biroi]
gi|307166565|gb|EFN60628.1| hypothetical protein EAG_05356 [Camponotus floridanus]			gi|380012403|ref|XP_003690273.1| PREDICTED: ammonium transporter Rh type B-like [Apis florea]
gi|322796595|gb|EFZ19069.1| hypothetical protein SINV_12600 [Solenopsis invicta]			gi|444245669|gb|AGD94516.1| clock, partial [Solenopsis invicta]
gi|332023906|gb|EGI64126.1| Pleckstrin-like proteiny domain-containing family M member 2 [Acromyrmex echinatior]			gi|322797003|gb|EFZ19317.1| hypothetical protein SINV_02136 [Solenopsis invicta]
gi|332030080|gb|EGI69905.1| Splicing factor, arginine/serine-rich 18 [Acromyrmex echinatior]			gi|322801504|gb|EFZ22165.1| hypothetical protein SINV_12318 [Solenopsis invicta]
gi|332025721|gb|EGI65879.1| F-box/LRR-repeat protein 20 [Acromyrmex echinatior]			gi|332021032|gb|EGI61421.1| Protein still life, isoforms C/SIF type 2 [Acromyrmex echinatior]
gi|332023474|gb|EGI63717.1| hypothetical protein G5I_07956 [Acromyrmex echinatior]			gi|307173760|gb|EFN64547.1| Cytoplasmic aconitate hydratase [Camponotus floridanus]
gi|307180439|gb|EFN68465.1| Synaptotagmin-6 [Camponotus floridanus]			gi|307175251|gb|EFN65297.1| Cystinosin-like protein [Camponotus floridanus]
gi|607363466|gb|EZA57698.1| EH domain-binding protein [Cerapachys biroi]			gi|332017886|gb|EGI58546.1| Chromodomain Y-like protein 2 [Acromyrmex echinatior]
gi|307175830|gb|EFN65645.1| Tetraspanin-31 [Camponotus floridanus]			gi|322795622|gb|EFZ18301.1| hypothetical protein SINV_01869 [Solenopsis invicta]
gi|332023546|gb|EGI63782.1| Mediator of RNA polymerase II transcription subunit 23 [Acromyrmex echinatior]			gi|519666758|tpg|DAA64515.1| TPA_inf: venus kinase receptor [Pogonomyrmex barbatus]
gi|332023053|gb|EGI63318.1| Growth inhibition and differentiation-related protein 88-like protein [Acromyrmex echinatior]			gi|322794007|gb|EFZ17245.1| hypothetical protein SINV_09516 [Solenopsis invicta]
gi|332023156|gb|EGI63412.1| Rho guanine nucleotide exchange factor 7 [Acromyrmex echinatior]			gi|332019667|gb|EGI60141.1| General transcription factor IIH subunit 3 [Acromyrmex echinatior]
gi|322798377|gb|EFZ20101.1| hypothetical protein SINV_07690 [Solenopsis invicta]			gi|607367043|gb|EZA61199.1| Pre-mRNA-processing factor 40-like protein A [Cerapachys biroi]
gi|332023936|gb|EGI64154.1| Phospholipase DDHD1 [Acromyrmex echinatior]			gi|322783670|gb|EFZ11008.1| hypothetical protein SINV_08350 [Solenopsis invicta]
gi|607353539|gb|EZA48284.1| Tyrosine-protein kinase Fps85D [Cerapachys biroi]			gi|322795322|gb|EFZ18127.1| hypothetical protein SINV_11879 [Solenopsis invicta]
gi|322788782|gb|EFZ14350.1| hypothetical protein SINV_03929 [Solenopsis invicta]			gi|307172990|gb|EFN64132.1| CREB-binding protein [Camponotus floridanus]
gi|571508090|ref|XP_006571280.1| PREDICTED: potassium voltage-gated channel protein Shal isoform X5 [Apis mellifera]			gi|307186408|gb|EFN72042.1| hypothetical protein EAG_13994 [Camponotus floridanus]
gi|332021632|gb|EGI61991.1| Small subunit processome component 20-like protein [Acromyrmex echinatior]			gi|307185951|gb|EFN71753.1| Abhydrolase domain-containing protein 13 [Camponotus floridanus]
gi|322800036|gb|EFZ21142.1| hypothetical protein SINV_01145 [Solenopsis invicta]			gi|332018338|gb|EGI58943.1| TBC1 domain family member 24 [Acromyrmex echinatior]
gi|332026435|gb|EGI66563.1| Disks large-associated protein 5 [Acromyrmex echinatior]			gi|322799194|gb|EFZ20624.1| hypothetical protein SINV_11906 [Solenopsis invicta]
gi|332022411|gb|EGI62719.1| Stromal membrane-associated protein 1 [Acromyrmex echinatior]			gi|322799119|gb|EFZ20566.1| hypothetical protein SINV_00071 [Solenopsis invicta]
gi|332020662|gb|EGI61068.1| Pre-mRNA-splicing factor 38B [Acromyrmex echinatior]			gi|307179430|gb|EFN67754.1| Hermansky-Pudlak syndrome 5 protein-like protein [Camponotus floridanus]
gi|332018514|gb|EGI59104.1| Zinc finger protein 474 [Acromyrmex echinatior]			gi|332024010|gb|EGI64228.1| Zinc finger protein 778 [Acromyrmex echinatior]
gi|332023872|gb|EGI64096.1| Major facilitator superfamily domain-containing protein 6 [Acromyrmex echinatior]			gi|340715358|ref|XP_003396182.1| PREDICTED: hypothetical protein LOC100647097 [Bombus terrestris]
gi|307177840|gb|EFN66803.1| USP6 N-terminal-like protein [Camponotus floridanus]			gi|332024905|gb|EGI65093.1| DE-cadherin [Acromyrmex echinatior]
gi|572299678|ref|XP_006615959.1| PREDICTED: RNA-binding protein fusilli-like isoform X1 [Apis dorsata]			gi|332018423|gb|EGI59017.1| Sodium-coupled monocarboxylate transporter 1 [Acromyrmex echinatior]
gi|332019603|gb|EGI60081.1| Sphingomyelin phosphodiesterase [Acromyrmex echinatior]			gi|307208674|gb|EFN85964.1| Wiskott-Aldrich syndrome protein [Harpegnathos saltator]
gi|322794510|gb|EFZ17563.1| hypothetical protein SINV_12524 [Solenopsis invicta]			gi|332023237|gb|EGI63493.1| High affinity cAMP-specific 3',5'-cyclic phosphodiesterase 7A [Acromyrmex echinatior]
gi|332023056|gb|EGI63321.1| hypothetical protein G5I_08350 [Acromyrmex echinatior]			gi|322778870|gb|EFZ09286.1| hypothetical protein SINV_11625 [Solenopsis invicta]
gi|322787479|gb|EFZ13567.1| hypothetical protein SINV_10895 [Solenopsis invicta]			gi|332022835|gb|EGI63108.1| Nucleosome assembly protein 1-like 4 [Acromyrmex echinatior]
gi|380028288|ref|XP_003697838.1| PREDICTED: hepatic leukemia factor-like [Apis florea] >gi|571570141|ref|XP_006560301.1| PREDICTED: hepatic leukemia factor isoform X6 [Apis mellifera] >gi|572300182|ref|XP_006616198.1| PREDICTED: hepatic leukemia factor-like isoform X2 [Apis dorsata]			gi|322785457|gb|EFZ12128.1| hypothetical protein SINV_09686 [Solenopsis invicta]
gi|332027430|gb|EGI67513.1| Zinc finger protein jing-like protein [Acromyrmex echinatior]			gi|380014686|ref|XP_003691353.1| PREDICTED: RNA-binding protein Musashi homolog Rbp6-like [Apis florea]
gi|607353921|gb|EZA48611.1| Serine/threonine-protein kinase [Cerapachys biroi]			gi|307183191|gb|EFN70100.1| Ankyrin repeat domain-containing protein 13C [Camponotus floridanus]
gi|332027974|gb|EGI68025.1| Exocyst complex component 5 [Acromyrmex echinatior]			gi|332025441|gb|EGI65606.1| Tachykinin [Acromyrmex echinatior]
gi|332018729|gb|EGI59300.1| Circadian clock-controlled protein [Acromyrmex echinatior]			gi|307191980|gb|EFN75370.1| NIK- and IKBKB-binding protein [Harpegnathos saltator]
gi|322802337|gb|EFZ22733.1| hypothetical protein SINV_14859 [Solenopsis invicta]			gi|332031079|gb|EGI70665.1| UBX domain-containing protein 1 [Acromyrmex echinatior]
gi|322802265|gb|EFZ22661.1| hypothetical protein SINV_04091 [Solenopsis invicta]			gi|607355919|gb|EZA50467.1| Serine/threonine-protein kinase N2 [Cerapachys biroi]
gi|322787264|gb|EFZ13400.1| hypothetical protein SINV_02203 [Solenopsis invicta]			gi|607353858|gb|EZA48553.1| Cyclic AMP-dependent transcription factor ATF-2 [Cerapachys biroi]
gi|322779058|gb|EFZ09452.1| hypothetical protein SINV_04023 [Solenopsis invicta]			gi|322797501|gb|EFZ19556.1| hypothetical protein SINV_13516 [Solenopsis invicta]
gi|332026722|gb|EGI66831.1| WD repeat-containing protein 20 [Acromyrmex echinatior]			gi|607359664|gb|EZA54017.1| Serine/threonine-protein kinase TAO1 [Cerapachys biroi]
gi|332030169|gb|EGI69963.1| Protein rhomboid [Acromyrmex echinatior]			gi|332030058|gb|EGI69883.1| Heparan sulfate 2-O-sulfotransferase 1 [Acromyrmex echinatior]
gi|332022509|gb|EGI62812.1| CTL-like protein 1 [Acromyrmex echinatior]			gi|307168873|gb|EFN61797.1| PAP-associated domain-containing protein 5 [Camponotus floridanus]
gi|307180196|gb|EFN68229.1| hypothetical protein EAG_13140 [Camponotus floridanus]			gi|665807802|ref|XP_008552196.1| PREDICTED: homeobox protein Nkx-2.4-like [Microplitis demolitor]
gi|571511387|ref|XP_006559191.1| PREDICTED: ferredoxin isoform X1 [Apis mellifera]			gi|307206688|gb|EFN84643.1| Transmembrane protein 53 [Harpegnathos saltator]
			gi|332026251|gb|EGI66390.1| Inner nuclear membrane protein Man1 [Acromyrmex echinatior]
			gi|571510716|ref|XP_006571795.1| PREDICTED: nucleolysin TIA-1 isoform p40-like isoform X1 [Apis mellifera] >gi|571510720|ref|XP_006571796.1| PREDICTED: nucleolysin TIA-1 isoform p40-like isoform X2 [Apis mellifera] >gi|571510723|ref|XP_006571797.1| PREDICTED: nucleolysin TIA-1 isoform p40-like isoform X3 [Apis mellifera] >gi|571510727|ref|XP_006571798.1| PREDICTED: nucleolysin TIA-1 isoform p40-l…
			gi|607360775|gb|EZA55096.1| hypothetical protein X777_05351, partial [Cerapachys biroi]
			gi|307184874|gb|EFN71152.1| Trypsin-7 [Camponotus floridanus]
			gi|332022276|gb|EGI62589.1| Proteasomal ubiquitin receptor ADRM1-like protein [Acromyrmex echinatior]
			gi|307172194|gb|EFN63719.1| Suppressor of tumorigenicity protein 14 [Camponotus floridanus]
			gi|607358425|gb|EZA52832.1| DNA repair and recombination protein RAD54B, partial [Cerapachys biroi]
			gi|350427767|ref|XP_003494874.1| PREDICTED: latrophilin Cirl-like isoform 1 [Bombus impatiens]
			gi|607355449|gb|EZA50029.1| Plancitoxin-1 [Cerapachys biroi]
			gi|322794483|gb|EFZ17536.1| hypothetical protein SINV_00075 [Solenopsis invicta]
			gi|332020610|gb|EGI61018.1| Lipid storage droplets surface-binding protein 2 [Acromyrmex echinatior]

## Sheet: pila-ambi
37 elements included exclusively in "T.ambi":				44 elements included exclusively in "T.ambi":					1 common element in "pila" and "ambi":
gi|607362625|gb|EZA56872.1| Dual oxidase [Cerapachys biroi]				gi|322798669|gb|EFZ20273.1| hypothetical protein SINV_16002 [Solenopsis invicta]					all6-vs-all610005052	gi|332023056|gb|EGI63321.1| hypothetical protein G5I_08350 [Acromyrmex echinatior]
gi|332027316|gb|EGI67400.1| Putative inorganic phosphate cotransporter [Acromyrmex echinatior]				gi|572258175|ref|XP_006607474.1| PREDICTED: plasma membrane calcium-transporting ATPase 3-like isoform X1 [Apis dorsata] >gi|572258177|ref|XP_006607475.1| PREDICTED: plasma membrane calcium-transporting ATPase 3-like isoform X2 [Apis dorsata] >gi|572258179|ref|XP_006607476.1| PREDICTED: plasma membrane calcium-transporting ATPase 3-like isoform X3 [Apis dorsata] >gi|572258181|ref|XP_006607477.1| …
gi|332019530|gb|EGI60009.1| Protein FAM38B [Acromyrmex echinatior]				gi|332027429|gb|EGI67512.1| SH3 and multiple ankyrin repeat domains protein 3 [Acromyrmex echinatior]
gi|571531898|ref|XP_006570278.1| PREDICTED: broad-complex core protein isoforms 1/2/3/4/5 isoform X4 [Apis mellifera]				gi|332023177|gb|EGI63433.1| hypothetical protein G5I_08161 [Acromyrmex echinatior]
gi|607354125|gb|EZA48788.1| Voltage-dependent T-type calcium channel subunit alpha-1G, partial [Cerapachys biroi]				gi|607367070|gb|EZA61226.1| Cysteinyl-tRNA synthetase, cytoplasmic [Cerapachys biroi]
gi|332022486|gb|EGI62793.1| Paired amphipathic helix protein Sin3a [Acromyrmex echinatior]				gi|332018334|gb|EGI58939.1| Relaxin receptor 1 [Acromyrmex echinatior]
gi|332019684|gb|EGI60158.1| Dual specificity mitogen-activated protein kinase kinase 7 [Acromyrmex echinatior]				gi|322799522|gb|EFZ20830.1| hypothetical protein SINV_10379 [Solenopsis invicta]
gi|307195629|gb|EFN77471.1| Cytosolic purine 5'-nucleotidase [Harpegnathos saltator]				gi|332027809|gb|EGI67874.1| E3 ubiquitin-protein ligase [Acromyrmex echinatior]
gi|607365914|gb|EZA60090.1| Zinc transporter ZIP1 [Cerapachys biroi]				gi|332018827|gb|EGI59386.1| Putative RNA-binding protein EEED8.10 [Acromyrmex echinatior]
gi|332019506|gb|EGI59985.1| Ankyrin repeat and death domain-containing protein 1A [Acromyrmex echinatior]				gi|332023475|gb|EGI63718.1| Collagen alpha-1(XXI) chain [Acromyrmex echinatior]
gi|332016885|gb|EGI57694.1| Uncharacterized protein [Acromyrmex echinatior]				gi|307204530|gb|EFN83210.1| Longitudinals lacking protein, isoform G [Harpegnathos saltator]
gi|322785879|gb|EFZ12498.1| hypothetical protein SINV_12415 [Solenopsis invicta]				gi|332018144|gb|EGI58753.1| Protein polybromo-1 [Acromyrmex echinatior]
gi|332028062|gb|EGI68113.1| UPF0407 protein [Acromyrmex echinatior]				gi|322793931|gb|EFZ17217.1| hypothetical protein SINV_80708 [Solenopsis invicta]
gi|350411953|ref|XP_003489499.1| PREDICTED: contactin-5-like [Bombus impatiens]				gi|340709272|ref|XP_003393235.1| PREDICTED: hypothetical protein LOC100649436 [Bombus terrestris]
gi|332023053|gb|EGI63318.1| Growth inhibition and differentiation-related protein 88-like protein [Acromyrmex echinatior]				gi|332018938|gb|EGI59484.1| Serine/threonine-protein kinase ICK [Acromyrmex echinatior]
gi|332019568|gb|EGI60047.1| RanBP-type and C3HC4-type zinc finger-containing protein 1 [Acromyrmex echinatior]				gi|332027274|gb|EGI67358.1| hypothetical protein G5I_04001 [Acromyrmex echinatior]
gi|332027679|gb|EGI67747.1| Protein trachealess [Acromyrmex echinatior]				gi|607363658|gb|EZA57890.1| Rho GTPase-activating protein [Cerapachys biroi]
gi|350425234|ref|XP_003494055.1| PREDICTED: hypothetical protein LOC100742880 [Bombus impatiens]				gi|332020119|gb|EGI60563.1| Endoribonuclease Dcr-1 [Acromyrmex echinatior]
gi|332023388|gb|EGI63633.1| Neither inactivation nor afterpotential protein G [Acromyrmex echinatior]				gi|383862169|ref|XP_003706556.1| PREDICTED: paired box protein Pax-6-like [Megachile rotundata]
gi|322801386|gb|EFZ22047.1| hypothetical protein SINV_02116 [Solenopsis invicta]				gi|607363545|gb|EZA57777.1| Serine/threonine-protein kinase 32B [Cerapachys biroi]
gi|332022366|gb|EGI62678.1| Engulfment and cell motility protein 1 [Acromyrmex echinatior]				gi|307179450|gb|EFN67774.1| Outer dense fiber protein 3 [Camponotus floridanus]
gi|322785436|gb|EFZ12107.1| hypothetical protein SINV_00022 [Solenopsis invicta]				gi|332027382|gb|EGI67465.1| GON-4-like protein [Acromyrmex echinatior]
gi|322790012|gb|EFZ15088.1| hypothetical protein SINV_09653 [Solenopsis invicta]				gi|307181255|gb|EFN68945.1| Solute carrier family 25 member 40 [Camponotus floridanus]
gi|607355002|gb|EZA49598.1| T-complex protein 1 subunit eta [Cerapachys biroi]				gi|350404867|ref|XP_003487245.1| PREDICTED: hypothetical protein LOC100741061 [Bombus impatiens]
gi|322802694|gb|EFZ22918.1| hypothetical protein SINV_06801 [Solenopsis invicta]				gi|332016792|gb|EGI57613.1| Golgi integral membrane protein 4 [Acromyrmex echinatior]
gi|340715053|ref|XP_003396035.1| PREDICTED: hypothetical protein LOC100648747 [Bombus terrestris]				gi|332024881|gb|EGI65069.1| Hexokinase type 2 [Acromyrmex echinatior]
gi|607364324|gb|EZA58536.1| Protein lap4 [Cerapachys biroi]				gi|332022219|gb|EGI62534.1| Fanconi anemia group I protein-like protein [Acromyrmex echinatior]
gi|307168569|gb|EFN61627.1| Kelch-like protein 10 [Camponotus floridanus]				gi|322785634|gb|EFZ12289.1| hypothetical protein SINV_15897 [Solenopsis invicta]
gi|572271079|ref|XP_006613517.1| PREDICTED: alkaline phosphatase, tissue-nonspecific isozyme-like [Apis dorsata]				gi|332028336|gb|EGI68383.1| SEC14-like protein 2 [Acromyrmex echinatior]
gi|607357636|gb|EZA52082.1| Harmonin [Cerapachys biroi]				gi|332021349|gb|EGI61723.1| Zinc finger FYVE domain-containing protein 1 [Acromyrmex echinatior]
gi|571510716|ref|XP_006571795.1| PREDICTED: nucleolysin TIA-1 isoform p40-like isoform X1 [Apis mellifera] >gi|571510720|ref|XP_006571796.1| PREDICTED: nucleolysin TIA-1 isoform p40-like isoform X2 [Apis mellifera] >gi|571510723|ref|XP_006571797.1| PREDICTED: nucleolysin TIA-1 isoform p40-like isoform X3 [Apis mellifera] >gi|571510727|ref|XP_006571798.1| PREDICTED: nucleolysin TIA-1 isoform p40-l…				gi|322794499|gb|EFZ17552.1| hypothetical protein SINV_07097 [Solenopsis invicta]
gi|332029549|gb|EGI69438.1| Nephrin [Acromyrmex echinatior]				gi|332021083|gb|EGI61470.1| Syntenin-1 [Acromyrmex echinatior]
gi|607353434|gb|EZA48197.1| Liprin-beta-1 [Cerapachys biroi]				gi|322796609|gb|EFZ19083.1| hypothetical protein SINV_80454 [Solenopsis invicta]
gi|307184467|gb|EFN70870.1| Fatty acyl-CoA reductase 1 [Camponotus floridanus]				gi|332023061|gb|EGI63326.1| Tuberin [Acromyrmex echinatior]
gi|332018110|gb|EGI58724.1| Mushroom body large-type Kenyon cell-specific protein 1 [Acromyrmex echinatior]				gi|607362096|gb|EZA56356.1| putative tRNA threonylcarbamoyladenosine biosynthesis protein osgep [Cerapachys biroi]
gi|607365331|gb|EZA59529.1| Sodium-coupled monocarboxylate transporter [Cerapachys biroi]				gi|322787031|gb|EFZ13255.1| hypothetical protein SINV_10430 [Solenopsis invicta]
gi|307214472|gb|EFN89509.1| hypothetical protein EAI_01741 [Harpegnathos saltator]				gi|322798634|gb|EFZ20238.1| hypothetical protein SINV_09639 [Solenopsis invicta]
				gi|383857865|ref|XP_003704424.1| PREDICTED: uncharacterized protein LOC100878076 [Megachile rotundata]
				gi|332029968|gb|EGI69793.1| hypothetical protein G5I_01336 [Acromyrmex echinatior]
				gi|322795981|gb|EFZ18605.1| hypothetical protein SINV_01964 [Solenopsis invicta]
				gi|307184874|gb|EFN71152.1| Trypsin-7 [Camponotus floridanus]
				gi|322800156|gb|EFZ21241.1| hypothetical protein SINV_01535 [Solenopsis invicta]
				gi|307184873|gb|EFN71151.1| Mite allergen Der p 3 [Camponotus floridanus]
				gi|332025816|gb|EGI65973.1| X-linked retinitis pigmentosa GTPase regulator [Acromyrmex echinatior]

## Sheet: ameri-curvi
208 elements included exclusively in "T.ameri":									65 elements included exclusively in "T.curvi":								3 common elements in "T.ameri" and "T.curvi":
gi|607364554|gb|EZA58766.1| Leukotriene A-4 hydrolase [Cerapachys biroi]									gi|322798669|gb|EFZ20273.1| hypothetical protein SINV_16002 [Solenopsis invicta]								gi|332024905|gb|EGI65093.1| DE-cadherin [Acromyrmex echinatior]
gi|322799964|gb|EFZ21090.1| hypothetical protein SINV_11995 [Solenopsis invicta]									gi|322792674|gb|EFZ16548.1| hypothetical protein SINV_12348 [Solenopsis invicta]								gi|607360775|gb|EZA55096.1| hypothetical protein X777_05351, partial [Cerapachys biroi]
gi|322801272|gb|EFZ21959.1| hypothetical protein SINV_06830 [Solenopsis invicta]									gi|332029741|gb|EGI69610.1| hypothetical protein G5I_01515 [Acromyrmex echinatior]								gi|307184874|gb|EFN71152.1| Trypsin-7 [Camponotus floridanus]
gi|332027316|gb|EGI67400.1| Putative inorganic phosphate cotransporter [Acromyrmex echinatior]									gi|332027647|gb|EGI67715.1| Autophagy-related protein 2-like protein B [Acromyrmex echinatior]
gi|322785442|gb|EFZ12113.1| hypothetical protein SINV_03790 [Solenopsis invicta]									gi|332016543|gb|EGI57424.1| SEC14 domain and spectrin repeat-containing protein 1 [Acromyrmex echinatior]
gi|332023970|gb|EGI64188.1| hypothetical protein G5I_07348 [Acromyrmex echinatior]									gi|307179768|gb|EFN67958.1| RB1-inducible coiled-coil protein 1 [Camponotus floridanus]
gi|332020980|gb|EGI61373.1| Kelch-like protein 5 [Acromyrmex echinatior]									gi|332018906|gb|EGI59452.1| hypothetical protein G5I_12358 [Acromyrmex echinatior]
gi|322786056|gb|EFZ12667.1| hypothetical protein SINV_02289 [Solenopsis invicta]									gi|322786168|gb|EFZ12773.1| hypothetical protein SINV_02726 [Solenopsis invicta]
gi|332018334|gb|EGI58939.1| Relaxin receptor 1 [Acromyrmex echinatior]									gi|607358496|gb|EZA52898.1| Epidermal growth factor receptor substrate 15-like protein [Cerapachys biroi]
gi|322794385|gb|EFZ17489.1| hypothetical protein SINV_80961 [Solenopsis invicta]									gi|332022486|gb|EGI62793.1| Paired amphipathic helix protein Sin3a [Acromyrmex echinatior]
gi|332017392|gb|EGI58128.1| Disintegrin and metalloproteinase domain-containing protein 11 [Acromyrmex echinatior]									gi|607356846|gb|EZA51338.1| Twinfilin [Cerapachys biroi]
gi|332021881|gb|EGI62217.1| hypothetical protein G5I_09467 [Acromyrmex echinatior]									gi|607365268|gb|EZA59466.1| Phosphofurin acidic cluster sorting protein [Cerapachys biroi]
gi|332023927|gb|EGI64145.1| Bloom syndrome protein-like protein [Acromyrmex echinatior]									gi|607360805|gb|EZA55124.1| Unc-13-like protein D [Cerapachys biroi]
gi|607356861|gb|EZA51353.1| N-acetylglucosamine-1-phosphotransferase subunits alpha/beta [Cerapachys biroi]									gi|380012403|ref|XP_003690273.1| PREDICTED: ammonium transporter Rh type B-like [Apis florea]
gi|383850040|ref|XP_003700636.1| PREDICTED: zinc finger and BTB domain-containing protein 34-like isoform 1 [Megachile rotundata]									gi|444245669|gb|AGD94516.1| clock, partial [Solenopsis invicta]
gi|332023977|gb|EGI64195.1| Connector enhancer of kinase suppressor of ras 3 [Acromyrmex echinatior]									gi|322797003|gb|EFZ19317.1| hypothetical protein SINV_02136 [Solenopsis invicta]
gi|189908194|gb|ACE60222.1| muscarinic acetylcholine receptor [Polyrhachis vicina]									gi|322801504|gb|EFZ22165.1| hypothetical protein SINV_12318 [Solenopsis invicta]
gi|332027392|gb|EGI67475.1| Potassium voltage-gated channel subfamily KQT member 1 [Acromyrmex echinatior]									gi|332021032|gb|EGI61421.1| Protein still life, isoforms C/SIF type 2 [Acromyrmex echinatior]
gi|307173647|gb|EFN64498.1| Potassium channel subfamily K member 9 [Camponotus floridanus]									gi|307173760|gb|EFN64547.1| Cytoplasmic aconitate hydratase [Camponotus floridanus]
gi|307180954|gb|EFN68742.1| Histone deacetylase 4 [Camponotus floridanus]									gi|307175251|gb|EFN65297.1| Cystinosin-like protein [Camponotus floridanus]
gi|607356804|gb|EZA51300.1| Solute carrier family 22 member [Cerapachys biroi]									gi|332017886|gb|EGI58546.1| Chromodomain Y-like protein 2 [Acromyrmex echinatior]
gi|665806106|ref|XP_008551279.1| PREDICTED: hippocampus abundant transcript 1 protein isoform X2 [Microplitis demolitor]									gi|322795622|gb|EFZ18301.1| hypothetical protein SINV_01869 [Solenopsis invicta]
gi|332031480|gb|EGI70964.1| Serine/threonine kinase 11-interacting protein [Acromyrmex echinatior]									gi|519666758|tpg|DAA64515.1| TPA_inf: venus kinase receptor [Pogonomyrmex barbatus]
gi|322787441|gb|EFZ13529.1| hypothetical protein SINV_05333 [Solenopsis invicta]									gi|322794007|gb|EFZ17245.1| hypothetical protein SINV_09516 [Solenopsis invicta]
gi|322794373|gb|EFZ17477.1| hypothetical protein SINV_09632 [Solenopsis invicta]									gi|332019667|gb|EGI60141.1| General transcription factor IIH subunit 3 [Acromyrmex echinatior]
gi|322799020|gb|EFZ20480.1| hypothetical protein SINV_15779 [Solenopsis invicta]									gi|607367043|gb|EZA61199.1| Pre-mRNA-processing factor 40-like protein A [Cerapachys biroi]
gi|332019179|gb|EGI59689.1| Poly(U)-specific endoribonuclease-A [Acromyrmex echinatior]									gi|322783670|gb|EFZ11008.1| hypothetical protein SINV_08350 [Solenopsis invicta]
gi|332021682|gb|EGI62038.1| Vascular endothelial growth factor receptor 1 [Acromyrmex echinatior]									gi|322795322|gb|EFZ18127.1| hypothetical protein SINV_11879 [Solenopsis invicta]
gi|307194123|gb|EFN76571.1| Copper-transporting ATPase 1 [Harpegnathos saltator]									gi|307172990|gb|EFN64132.1| CREB-binding protein [Camponotus floridanus]
gi|571519613|ref|XP_006564059.1| PREDICTED: phosphatase and actin regulator 4 isoform X5 [Apis mellifera]									gi|307186408|gb|EFN72042.1| hypothetical protein EAG_13994 [Camponotus floridanus]
gi|322794045|gb|EFZ17261.1| hypothetical protein SINV_01845 [Solenopsis invicta]									gi|307185951|gb|EFN71753.1| Abhydrolase domain-containing protein 13 [Camponotus floridanus]
gi|307180390|gb|EFN68416.1| Neurofibromin [Camponotus floridanus]									gi|332018338|gb|EGI58943.1| TBC1 domain family member 24 [Acromyrmex echinatior]
gi|332029099|gb|EGI69113.1| Biorientation of chromosomes in cell division protein 1-like protein [Acromyrmex echinatior]									gi|322799194|gb|EFZ20624.1| hypothetical protein SINV_11906 [Solenopsis invicta]
gi|332027967|gb|EGI68018.1| Gastrula zinc finger protein 5-1 [Acromyrmex echinatior]									gi|322799119|gb|EFZ20566.1| hypothetical protein SINV_00071 [Solenopsis invicta]
gi|332025093|gb|EGI65274.1| Protein hunchback [Acromyrmex echinatior]									gi|307179430|gb|EFN67754.1| Hermansky-Pudlak syndrome 5 protein-like protein [Camponotus floridanus]
gi|383849890|ref|XP_003700567.1| PREDICTED: potassium voltage-gated channel protein eag-like [Megachile rotundata]									gi|332024010|gb|EGI64228.1| Zinc finger protein 778 [Acromyrmex echinatior]
gi|332025125|gb|EGI65305.1| Cytochrome b5 reductase 4 [Acromyrmex echinatior]									gi|340715358|ref|XP_003396182.1| PREDICTED: hypothetical protein LOC100647097 [Bombus terrestris]
gi|332028624|gb|EGI68659.1| WD and tetratricopeptide repeats protein 1 [Acromyrmex echinatior]									gi|332018423|gb|EGI59017.1| Sodium-coupled monocarboxylate transporter 1 [Acromyrmex echinatior]
gi|332024523|gb|EGI64721.1| Pre-rRNA-processing protein TSR1-like protein [Acromyrmex echinatior]									gi|307208674|gb|EFN85964.1| Wiskott-Aldrich syndrome protein [Harpegnathos saltator]
gi|322778939|gb|EFZ09353.1| hypothetical protein SINV_03278 [Solenopsis invicta]									gi|332023237|gb|EGI63493.1| High affinity cAMP-specific 3',5'-cyclic phosphodiesterase 7A [Acromyrmex echinatior]
gi|607363562|gb|EZA57794.1| hypothetical protein X777_00896 [Cerapachys biroi]									gi|322778870|gb|EFZ09286.1| hypothetical protein SINV_11625 [Solenopsis invicta]
gi|307195790|gb|EFN77604.1| Lysosome membrane protein 2 [Harpegnathos saltator]									gi|332022835|gb|EGI63108.1| Nucleosome assembly protein 1-like 4 [Acromyrmex echinatior]
gi|322792852|gb|EFZ16685.1| hypothetical protein SINV_10130 [Solenopsis invicta]									gi|322785457|gb|EFZ12128.1| hypothetical protein SINV_09686 [Solenopsis invicta]
gi|332026109|gb|EGI66257.1| Rho GTPase-activating protein 20 [Acromyrmex echinatior]									gi|380014686|ref|XP_003691353.1| PREDICTED: RNA-binding protein Musashi homolog Rbp6-like [Apis florea]
gi|307183988|gb|EFN70559.1| WD repeat-containing protein 37 [Camponotus floridanus]									gi|307183191|gb|EFN70100.1| Ankyrin repeat domain-containing protein 13C [Camponotus floridanus]
gi|332018900|gb|EGI59446.1| Transcriptional repressor scratch 2 [Acromyrmex echinatior]									gi|332025441|gb|EGI65606.1| Tachykinin [Acromyrmex echinatior]
gi|332023976|gb|EGI64194.1| Protein ITFG3 [Acromyrmex echinatior]									gi|307191980|gb|EFN75370.1| NIK- and IKBKB-binding protein [Harpegnathos saltator]
gi|322785452|gb|EFZ12123.1| hypothetical protein SINV_07398 [Solenopsis invicta]									gi|332031079|gb|EGI70665.1| UBX domain-containing protein 1 [Acromyrmex echinatior]
gi|332031284|gb|EGI70812.1| Mitochondrial enolase superfamily member 1 [Acromyrmex echinatior]									gi|607355919|gb|EZA50467.1| Serine/threonine-protein kinase N2 [Cerapachys biroi]
gi|340709362|ref|XP_003393279.1| PREDICTED: trace amine-associated receptor 8b-like [Bombus terrestris]									gi|607353858|gb|EZA48553.1| Cyclic AMP-dependent transcription factor ATF-2 [Cerapachys biroi]
gi|332028485|gb|EGI68526.1| Superoxide dismutase [Cu-Zn], chloroplastic [Acromyrmex echinatior]									gi|322797501|gb|EFZ19556.1| hypothetical protein SINV_13516 [Solenopsis invicta]
gi|322780408|gb|EFZ09896.1| hypothetical protein SINV_03206 [Solenopsis invicta]									gi|607359664|gb|EZA54017.1| Serine/threonine-protein kinase TAO1 [Cerapachys biroi]
gi|332020119|gb|EGI60563.1| Endoribonuclease Dcr-1 [Acromyrmex echinatior]									gi|332030058|gb|EGI69883.1| Heparan sulfate 2-O-sulfotransferase 1 [Acromyrmex echinatior]
gi|322801939|gb|EFZ22486.1| hypothetical protein SINV_00170 [Solenopsis invicta]									gi|307168873|gb|EFN61797.1| PAP-associated domain-containing protein 5 [Camponotus floridanus]
gi|332026878|gb|EGI66979.1| YEATS domain-containing protein 2 [Acromyrmex echinatior]									gi|665807802|ref|XP_008552196.1| PREDICTED: homeobox protein Nkx-2.4-like [Microplitis demolitor]
gi|307191458|gb|EFN74999.1| Vacuolar protein sorting-associated protein 13A [Camponotus floridanus]									gi|307206688|gb|EFN84643.1| Transmembrane protein 53 [Harpegnathos saltator]
gi|383859913|ref|XP_003705436.1| PREDICTED: calpain-B-like isoform 1 [Megachile rotundata]									gi|332026251|gb|EGI66390.1| Inner nuclear membrane protein Man1 [Acromyrmex echinatior]
gi|332022138|gb|EGI62460.1| Protein neuralized [Acromyrmex echinatior]									gi|571510716|ref|XP_006571795.1| PREDICTED: nucleolysin TIA-1 isoform p40-like isoform X1 [Apis mellifera] >gi|571510720|ref|XP_006571796.1| PREDICTED: nucleolysin TIA-1 isoform p40-like isoform X2 [Apis mellifera] >gi|571510723|ref|XP_006571797.1| PREDICTED: nucleolysin TIA-1 isoform p40-like isoform X3 [Apis mellifera] >gi|571510727|ref|XP_006571798.1| PREDICTED: nucleolysin TIA-1 isoform p40-l…
gi|332027388|gb|EGI67471.1| Dolichol kinase [Acromyrmex echinatior]									gi|332022276|gb|EGI62589.1| Proteasomal ubiquitin receptor ADRM1-like protein [Acromyrmex echinatior]
gi|307176273|gb|EFN65904.1| Alpha-mannosidase 2 [Camponotus floridanus]									gi|307172194|gb|EFN63719.1| Suppressor of tumorigenicity protein 14 [Camponotus floridanus]
gi|332026263|gb|EGI66402.1| RING finger protein 17 [Acromyrmex echinatior]									gi|607358425|gb|EZA52832.1| DNA repair and recombination protein RAD54B, partial [Cerapachys biroi]
gi|322792299|gb|EFZ16283.1| hypothetical protein SINV_03457 [Solenopsis invicta]									gi|350427767|ref|XP_003494874.1| PREDICTED: latrophilin Cirl-like isoform 1 [Bombus impatiens]
gi|332029806|gb|EGI69675.1| hypothetical protein G5I_01582 [Acromyrmex echinatior]									gi|607355449|gb|EZA50029.1| Plancitoxin-1 [Cerapachys biroi]
gi|332019295|gb|EGI59803.1| Sugar transporter ERD6-like 7 [Acromyrmex echinatior]									gi|322794483|gb|EFZ17536.1| hypothetical protein SINV_00075 [Solenopsis invicta]
gi|332021627|gb|EGI61986.1| MPN domain-containing protein [Acromyrmex echinatior]									gi|332020610|gb|EGI61018.1| Lipid storage droplets surface-binding protein 2 [Acromyrmex echinatior]
gi|332030227|gb|EGI70010.1| ATPase family AAA domain-containing protein 5 [Acromyrmex echinatior]
gi|332023210|gb|EGI63466.1| NCK-interacting protein with SH3 domain [Acromyrmex echinatior]
gi|332027618|gb|EGI67688.1| DNA-binding protein RFX7 [Acromyrmex echinatior]
gi|307194255|gb|EFN76651.1| Matrix metalloproteinase-14 [Harpegnathos saltator]
gi|322788784|gb|EFZ14352.1| hypothetical protein SINV_04467 [Solenopsis invicta]
gi|307176412|gb|EFN65986.1| Protein diaphanous [Camponotus floridanus]
gi|340728384|ref|XP_003402505.1| PREDICTED: hypothetical protein LOC100642668 [Bombus terrestris]
gi|332020645|gb|EGI61051.1| Protein zer-1-like protein [Acromyrmex echinatior]
gi|332020633|gb|EGI61040.1| C2 domain-containing protein 3 [Acromyrmex echinatior]
gi|322784371|gb|EFZ11342.1| hypothetical protein SINV_03492 [Solenopsis invicta]
gi|332024128|gb|EGI64344.1| Tyrosine-protein phosphatase 10D [Acromyrmex echinatior]
gi|332019898|gb|EGI60359.1| Receptor-type tyrosine-protein phosphatase N2 [Acromyrmex echinatior]
gi|322799521|gb|EFZ20829.1| hypothetical protein SINV_10169 [Solenopsis invicta]
gi|332027382|gb|EGI67465.1| GON-4-like protein [Acromyrmex echinatior]
gi|307173242|gb|EFN64295.1| Glucosamine--fructose-6-phosphate aminotransferase [isomerizing] 2 [Camponotus floridanus]
gi|607366079|gb|EZA60250.1| Dipeptidyl peptidase [Cerapachys biroi]
gi|332026786|gb|EGI66895.1| Annulin [Acromyrmex echinatior]
gi|607360340|gb|EZA54671.1| Choline O-acetyltransferase [Cerapachys biroi]
gi|332031508|gb|EGI70980.1| NudC domain-containing protein 1 [Acromyrmex echinatior]
gi|332018798|gb|EGI59359.1| Cyclin-L1 [Acromyrmex echinatior]
gi|332022829|gb|EGI63102.1| hypothetical protein G5I_08549 [Acromyrmex echinatior]
gi|322780593|gb|EFZ09977.1| hypothetical protein SINV_12881 [Solenopsis invicta]
gi|307166916|gb|EFN60820.1| RING and PHD-finger domain-containing protein KIAA1542 [Camponotus floridanus]
gi|645010644|ref|XP_008213553.1| PREDICTED: serine/threonine-protein kinase MARK2-like isoform X10 [Nasonia vitripennis] >gi|645010647|ref|XP_008213554.1| PREDICTED: serine/threonine-protein kinase MARK2-like isoform X10 [Nasonia vitripennis] >gi|645010650|ref|XP_008213555.1| PREDICTED: serine/threonine-protein kinase MARK2-like isoform X10 [Nasonia vitripennis]
gi|332028893|gb|EGI68915.1| Zinc finger protein 358 [Acromyrmex echinatior]
gi|307175603|gb|EFN65512.1| hypothetical protein EAG_10300 [Camponotus floridanus]
gi|332030674|gb|EGI70362.1| Arginyl-tRNA synthetase, cytoplasmic [Acromyrmex echinatior]
gi|332030031|gb|EGI69856.1| X-linked retinitis pigmentosa GTPase regulator-like protein [Acromyrmex echinatior]
gi|332030153|gb|EGI69947.1| Putative Rho GTPase-activating protein [Acromyrmex echinatior]
gi|607368385|gb|EZA62498.1| High affinity cGMP-specific 3',5'-cyclic phosphodiesterase 9A [Cerapachys biroi]
gi|332025578|gb|EGI65741.1| Receptor-type tyrosine-protein phosphatase beta [Acromyrmex echinatior]
gi|332017502|gb|EGI58222.1| hypothetical protein G5I_13695 [Acromyrmex echinatior]
gi|332028322|gb|EGI68369.1| Exportin-4 [Acromyrmex echinatior]
gi|322789179|gb|EFZ14565.1| hypothetical protein SINV_11515 [Solenopsis invicta]
gi|332024497|gb|EGI64695.1| Myelin gene regulatory factor [Acromyrmex echinatior]
gi|322788189|gb|EFZ13971.1| hypothetical protein SINV_08318 [Solenopsis invicta]
gi|332023071|gb|EGI63336.1| Protein TRC8-like protein [Acromyrmex echinatior]
gi|332028992|gb|EGI69006.1| ATP-dependent RNA helicase vasa [Acromyrmex echinatior]
gi|332020668|gb|EGI61074.1| Omega-amidase NIT2 [Acromyrmex echinatior]
gi|607367365|gb|EZA61512.1| hypothetical protein X777_07845 [Cerapachys biroi]
gi|322794757|gb|EFZ17704.1| hypothetical protein SINV_02546 [Solenopsis invicta]
gi|332022348|gb|EGI62660.1| Angiotensin-converting enzyme [Acromyrmex echinatior]
gi|332024107|gb|EGI64323.1| Recombination repair protein 1 [Acromyrmex echinatior]
gi|322798375|gb|EFZ20099.1| hypothetical protein SINV_06790 [Solenopsis invicta]
gi|332022776|gb|EGI63049.1| DNA-dependent protein kinase catalytic subunit [Acromyrmex echinatior]
gi|332024495|gb|EGI64693.1| Receptor-type tyrosine-protein phosphatase R [Acromyrmex echinatior]
gi|307183173|gb|EFN70082.1| Nucleoprotein TPR [Camponotus floridanus]
gi|307183170|gb|EFN70079.1| Neurabin-1 [Camponotus floridanus]
gi|332023828|gb|EGI64052.1| Fibrillin-3 [Acromyrmex echinatior]
gi|307186388|gb|EFN72022.1| Breast cancer type 2 susceptibility protein-like protein [Camponotus floridanus]
gi|332022382|gb|EGI62694.1| Anaphase-promoting complex subunit 5 [Acromyrmex echinatior]
gi|322778760|gb|EFZ09176.1| hypothetical protein SINV_03430 [Solenopsis invicta]
gi|332018156|gb|EGI58762.1| Synaptotagmin 1 [Acromyrmex echinatior]
gi|322784375|gb|EFZ11346.1| hypothetical protein SINV_04299 [Solenopsis invicta]
gi|322783217|gb|EFZ10803.1| hypothetical protein SINV_06224 [Solenopsis invicta]
gi|322796014|gb|EFZ18638.1| hypothetical protein SINV_10407 [Solenopsis invicta]
gi|332018155|gb|EGI58761.1| Fibroblast growth factor receptor substrate 2 [Acromyrmex echinatior]
gi|332022740|gb|EGI63016.1| BTB/POZ domain-containing protein 8 [Acromyrmex echinatior]
gi|332024679|gb|EGI64872.1| Nischarin [Acromyrmex echinatior]
gi|322785350|gb|EFZ12024.1| hypothetical protein SINV_09539 [Solenopsis invicta]
gi|332030095|gb|EGI69920.1| E3 ubiquitin-protein ligase [Acromyrmex echinatior]
gi|322801998|gb|EFZ22535.1| hypothetical protein SINV_05735 [Solenopsis invicta]
gi|332024524|gb|EGI64722.1| DnaJ-like protein subfamily C member 14 [Acromyrmex echinatior]
gi|322783222|gb|EFZ10808.1| hypothetical protein SINV_06875 [Solenopsis invicta]
gi|332021887|gb|EGI62223.1| Protein tamozhennic [Acromyrmex echinatior]
gi|332022965|gb|EGI63231.1| S1 RNA-binding domain-containing protein 1 [Acromyrmex echinatior]
gi|332016239|gb|EGI57152.1| RNA-binding protein squid [Acromyrmex echinatior]
gi|332023428|gb|EGI63671.1| Zinc finger RNA-binding protein [Acromyrmex echinatior]
gi|307184245|gb|EFN70718.1| DNA topoisomerase 3-beta-1 [Camponotus floridanus]
gi|607368463|gb|EZA62576.1| Putative phosphoenolpyruvate synthase [Cerapachys biroi]
gi|607361750|gb|EZA56025.1| Fanconi anemia group J protein-like protein [Cerapachys biroi]
gi|322801460|gb|EFZ22121.1| hypothetical protein SINV_07959 [Solenopsis invicta]
gi|307182568|gb|EFN69761.1| 26S proteasome non-ATPase regulatory subunit 4 [Camponotus floridanus]
gi|332016569|gb|EGI57450.1| Mediator of DNA damage checkpoint protein 1 [Acromyrmex echinatior]
gi|332026696|gb|EGI66805.1| F-box only protein 11 [Acromyrmex echinatior]
gi|332016538|gb|EGI57419.1| Basic fibroblast growth factor receptor 1 [Acromyrmex echinatior]
gi|307214967|gb|EFN89812.1| hypothetical protein EAI_14002 [Harpegnathos saltator]
gi|332024092|gb|EGI64309.1| Cytochrome b5 [Acromyrmex echinatior]
gi|607352533|gb|EZA47473.1| Trafficking protein particle complex subunit [Cerapachys biroi]
gi|307179392|gb|EFN67722.1| Transcription initiation factor IIB [Camponotus floridanus]
gi|332024274|gb|EGI64476.1| Fibroblast growth factor receptor-like protein 1 [Acromyrmex echinatior]
gi|322792670|gb|EFZ16544.1| hypothetical protein SINV_10183 [Solenopsis invicta]
gi|607366359|gb|EZA60529.1| WD repeat-containing protein [Cerapachys biroi]
gi|332028618|gb|EGI68653.1| BTB/POZ domain-containing protein 3 [Acromyrmex echinatior]
gi|322801923|gb|EFZ22476.1| hypothetical protein SINV_09234 [Solenopsis invicta]
gi|332023826|gb|EGI64050.1| Round spermatid basic protein 1-like protein [Acromyrmex echinatior]
gi|332017479|gb|EGI58202.1| Low-density lipoprotein receptor-related protein 6 [Acromyrmex echinatior]
gi|322796609|gb|EFZ19083.1| hypothetical protein SINV_80454 [Solenopsis invicta]
gi|332019648|gb|EGI60122.1| DnaJ-like protein subfamily C member 8 [Acromyrmex echinatior]
gi|332016531|gb|EGI57412.1| Leucine-rich repeat-containing protein 49 [Acromyrmex echinatior]
gi|322800819|gb|EFZ21694.1| hypothetical protein SINV_09245 [Solenopsis invicta]
gi|332016434|gb|EGI57347.1| hypothetical protein G5I_14818 [Acromyrmex echinatior]
gi|332030591|gb|EGI70279.1| hypothetical protein G5I_01038 [Acromyrmex echinatior]
gi|322801622|gb|EFZ22263.1| hypothetical protein SINV_10702 [Solenopsis invicta]
gi|332025826|gb|EGI65983.1| Blood vessel epicardial substance [Acromyrmex echinatior]
gi|322802325|gb|EFZ22721.1| hypothetical protein SINV_12919 [Solenopsis invicta]
gi|322794237|gb|EFZ17413.1| hypothetical protein SINV_07588 [Solenopsis invicta]
gi|322800453|gb|EFZ21457.1| hypothetical protein SINV_10940 [Solenopsis invicta]
gi|332030033|gb|EGI69858.1| CCR4-NOT transcription complex subunit 10 [Acromyrmex echinatior]
gi|332022361|gb|EGI62673.1| ATP-dependent RNA helicase Ddx1 [Acromyrmex echinatior]
gi|332021642|gb|EGI62001.1| Nitric oxide synthase, salivary gland [Acromyrmex echinatior]
gi|332023056|gb|EGI63321.1| hypothetical protein G5I_08350 [Acromyrmex echinatior]
gi|307183293|gb|EFN70162.1| Eukaryotic translation initiation factor 3 subunit M [Camponotus floridanus]
gi|332021864|gb|EGI62200.1| Nucleolar protein 11 [Acromyrmex echinatior]
gi|307189412|gb|EFN73822.1| OTU domain-containing protein 4 [Camponotus floridanus]
gi|332029571|gb|EGI69460.1| Integrator complex subunit 1 [Acromyrmex echinatior]
gi|332023103|gb|EGI63364.1| Putative ATP-dependent RNA helicase DDX23 [Acromyrmex echinatior]
gi|332018788|gb|EGI59349.1| Nuclear receptor coactivator 5 [Acromyrmex echinatior]
gi|322801510|gb|EFZ22171.1| hypothetical protein SINV_12925 [Solenopsis invicta]
gi|332018435|gb|EGI59029.1| LIM/homeobox protein Lhx3 [Acromyrmex echinatior]
gi|332031502|gb|EGI70974.1| Protein TRS85-like protein [Acromyrmex echinatior]
gi|332024173|gb|EGI64388.1| hypothetical protein G5I_07193 [Acromyrmex echinatior]
gi|332029549|gb|EGI69438.1| Nephrin [Acromyrmex echinatior]
gi|307212379|gb|EFN88171.1| UPF0550 protein C7orf28-like protein [Harpegnathos saltator]
gi|332020685|gb|EGI61091.1| THO complex subunit 5-like protein [Acromyrmex echinatior]
gi|307188080|gb|EFN72912.1| Broad-complex core protein isoform 6 [Camponotus floridanus]
gi|332018729|gb|EGI59300.1| Circadian clock-controlled protein [Acromyrmex echinatior]
gi|332027767|gb|EGI67834.1| Esterase FE4 [Acromyrmex echinatior]
gi|332028596|gb|EGI68633.1| Isthmin [Acromyrmex echinatior]
gi|332020812|gb|EGI61210.1| Centromere-associated protein E [Acromyrmex echinatior]
gi|307198065|gb|EFN79118.1| Tetraspanin-3 [Harpegnathos saltator]
gi|332024112|gb|EGI64328.1| Waprin-Phi1 [Acromyrmex echinatior]
gi|332027370|gb|EGI67453.1| Cysteine-rich protein 2-binding protein [Acromyrmex echinatior]
gi|332016527|gb|EGI57408.1| DnaJ-like protein subfamily C member 13 [Acromyrmex echinatior]
gi|332025132|gb|EGI65312.1| hypothetical protein G5I_06171 [Acromyrmex echinatior]
gi|307185193|gb|EFN71330.1| Putative GPI-anchor transamidase [Camponotus floridanus]
gi|322785355|gb|EFZ12029.1| hypothetical protein SINV_11931 [Solenopsis invicta]
gi|332021880|gb|EGI62216.1| Homocysteine-responsive endoplasmic reticulum-resident ubiquitin-like domain member 2 protein [Acromyrmex echinatior]
gi|383849418|ref|XP_003700342.1| PREDICTED: THAP domain-containing protein 8-like [Megachile rotundata]
gi|322796760|gb|EFZ19193.1| hypothetical protein SINV_16140 [Solenopsis invicta]
gi|322799222|gb|EFZ20637.1| hypothetical protein SINV_06026 [Solenopsis invicta]
gi|340713345|ref|XP_003395205.1| PREDICTED: zinc finger protein 721-like [Bombus terrestris]
gi|307189723|gb|EFN74016.1| Dopamine D2-like receptor [Camponotus floridanus]
gi|332027992|gb|EGI68043.1| hypothetical protein G5I_03137 [Acromyrmex echinatior]
gi|307178088|gb|EFN66915.1| Transmembrane protein C2orf18 [Camponotus floridanus]
gi|332018745|gb|EGI59310.1| hypothetical protein G5I_12515 [Acromyrmex echinatior]
gi|607360750|gb|EZA55074.1| Chitobiosyldiphosphodolichol beta-mannosyltransferase [Cerapachys biroi]
gi|332030022|gb|EGI69847.1| RNA methyltransferase-like protein 1 [Acromyrmex echinatior]
gi|332024944|gb|EGI65131.1| hypothetical protein G5I_06309 [Acromyrmex echinatior]
gi|332021660|gb|EGI62019.1| DOMON domain-containing protein [Acromyrmex echinatior]
gi|607362469|gb|EZA56721.1| Venom phospholipase A1 [Cerapachys biroi]
gi|607367294|gb|EZA61441.1| hypothetical protein X777_07774 [Cerapachys biroi]
gi|322801864|gb|EFZ22436.1| hypothetical protein SINV_10615 [Solenopsis invicta]

## Sheet: ameri-ambi
205 elements included exclusively in "T.ameri":									39 elements included exclusively in "T.ambi":								6 common elements in "T.ameri" and "T.ambi":
gi|607364554|gb|EZA58766.1| Leukotriene A-4 hydrolase [Cerapachys biroi]									gi|322798669|gb|EFZ20273.1| hypothetical protein SINV_16002 [Solenopsis invicta]								gi|332018334|gb|EGI58939.1| Relaxin receptor 1 [Acromyrmex echinatior]
gi|322799964|gb|EFZ21090.1| hypothetical protein SINV_11995 [Solenopsis invicta]									gi|572258175|ref|XP_006607474.1| PREDICTED: plasma membrane calcium-transporting ATPase 3-like isoform X1 [Apis dorsata] >gi|572258177|ref|XP_006607475.1| PREDICTED: plasma membrane calcium-transporting ATPase 3-like isoform X2 [Apis dorsata] >gi|572258179|ref|XP_006607476.1| PREDICTED: plasma membrane calcium-transporting ATPase 3-like isoform X3 [Apis dorsata] >gi|572258181|ref|XP_006607477.1| …								gi|332020119|gb|EGI60563.1| Endoribonuclease Dcr-1 [Acromyrmex echinatior]
gi|322801272|gb|EFZ21959.1| hypothetical protein SINV_06830 [Solenopsis invicta]									gi|332027429|gb|EGI67512.1| SH3 and multiple ankyrin repeat domains protein 3 [Acromyrmex echinatior]								gi|332027382|gb|EGI67465.1| GON-4-like protein [Acromyrmex echinatior]
gi|332027316|gb|EGI67400.1| Putative inorganic phosphate cotransporter [Acromyrmex echinatior]									gi|332023177|gb|EGI63433.1| hypothetical protein G5I_08161 [Acromyrmex echinatior]								gi|322796609|gb|EFZ19083.1| hypothetical protein SINV_80454 [Solenopsis invicta]
gi|322785442|gb|EFZ12113.1| hypothetical protein SINV_03790 [Solenopsis invicta]									gi|607367070|gb|EZA61226.1| Cysteinyl-tRNA synthetase, cytoplasmic [Cerapachys biroi]								gi|332023056|gb|EGI63321.1| hypothetical protein G5I_08350 [Acromyrmex echinatior]
gi|332023970|gb|EGI64188.1| hypothetical protein G5I_07348 [Acromyrmex echinatior]									gi|322799522|gb|EFZ20830.1| hypothetical protein SINV_10379 [Solenopsis invicta]								gi|307184874|gb|EFN71152.1| Trypsin-7 [Camponotus floridanus]
gi|332020980|gb|EGI61373.1| Kelch-like protein 5 [Acromyrmex echinatior]									gi|332027809|gb|EGI67874.1| E3 ubiquitin-protein ligase [Acromyrmex echinatior]
gi|322786056|gb|EFZ12667.1| hypothetical protein SINV_02289 [Solenopsis invicta]									gi|332018827|gb|EGI59386.1| Putative RNA-binding protein EEED8.10 [Acromyrmex echinatior]
gi|322794385|gb|EFZ17489.1| hypothetical protein SINV_80961 [Solenopsis invicta]									gi|332023475|gb|EGI63718.1| Collagen alpha-1(XXI) chain [Acromyrmex echinatior]
gi|332017392|gb|EGI58128.1| Disintegrin and metalloproteinase domain-containing protein 11 [Acromyrmex echinatior]									gi|307204530|gb|EFN83210.1| Longitudinals lacking protein, isoform G [Harpegnathos saltator]
gi|332021881|gb|EGI62217.1| hypothetical protein G5I_09467 [Acromyrmex echinatior]									gi|332018144|gb|EGI58753.1| Protein polybromo-1 [Acromyrmex echinatior]
gi|332023927|gb|EGI64145.1| Bloom syndrome protein-like protein [Acromyrmex echinatior]									gi|322793931|gb|EFZ17217.1| hypothetical protein SINV_80708 [Solenopsis invicta]
gi|607356861|gb|EZA51353.1| N-acetylglucosamine-1-phosphotransferase subunits alpha/beta [Cerapachys biroi]									gi|340709272|ref|XP_003393235.1| PREDICTED: hypothetical protein LOC100649436 [Bombus terrestris]
gi|383850040|ref|XP_003700636.1| PREDICTED: zinc finger and BTB domain-containing protein 34-like isoform 1 [Megachile rotundata]									gi|332018938|gb|EGI59484.1| Serine/threonine-protein kinase ICK [Acromyrmex echinatior]
gi|332023977|gb|EGI64195.1| Connector enhancer of kinase suppressor of ras 3 [Acromyrmex echinatior]									gi|332027274|gb|EGI67358.1| hypothetical protein G5I_04001 [Acromyrmex echinatior]
gi|189908194|gb|ACE60222.1| muscarinic acetylcholine receptor [Polyrhachis vicina]									gi|607363658|gb|EZA57890.1| Rho GTPase-activating protein [Cerapachys biroi]
gi|332027392|gb|EGI67475.1| Potassium voltage-gated channel subfamily KQT member 1 [Acromyrmex echinatior]									gi|383862169|ref|XP_003706556.1| PREDICTED: paired box protein Pax-6-like [Megachile rotundata]
gi|307173647|gb|EFN64498.1| Potassium channel subfamily K member 9 [Camponotus floridanus]									gi|607363545|gb|EZA57777.1| Serine/threonine-protein kinase 32B [Cerapachys biroi]
gi|307180954|gb|EFN68742.1| Histone deacetylase 4 [Camponotus floridanus]									gi|307179450|gb|EFN67774.1| Outer dense fiber protein 3 [Camponotus floridanus]
gi|607356804|gb|EZA51300.1| Solute carrier family 22 member [Cerapachys biroi]									gi|307181255|gb|EFN68945.1| Solute carrier family 25 member 40 [Camponotus floridanus]
gi|665806106|ref|XP_008551279.1| PREDICTED: hippocampus abundant transcript 1 protein isoform X2 [Microplitis demolitor]									gi|350404867|ref|XP_003487245.1| PREDICTED: hypothetical protein LOC100741061 [Bombus impatiens]
gi|332031480|gb|EGI70964.1| Serine/threonine kinase 11-interacting protein [Acromyrmex echinatior]									gi|332016792|gb|EGI57613.1| Golgi integral membrane protein 4 [Acromyrmex echinatior]
gi|322787441|gb|EFZ13529.1| hypothetical protein SINV_05333 [Solenopsis invicta]									gi|332024881|gb|EGI65069.1| Hexokinase type 2 [Acromyrmex echinatior]
gi|322794373|gb|EFZ17477.1| hypothetical protein SINV_09632 [Solenopsis invicta]									gi|332022219|gb|EGI62534.1| Fanconi anemia group I protein-like protein [Acromyrmex echinatior]
gi|322799020|gb|EFZ20480.1| hypothetical protein SINV_15779 [Solenopsis invicta]									gi|322785634|gb|EFZ12289.1| hypothetical protein SINV_15897 [Solenopsis invicta]
gi|332019179|gb|EGI59689.1| Poly(U)-specific endoribonuclease-A [Acromyrmex echinatior]									gi|332028336|gb|EGI68383.1| SEC14-like protein 2 [Acromyrmex echinatior]
gi|332021682|gb|EGI62038.1| Vascular endothelial growth factor receptor 1 [Acromyrmex echinatior]									gi|332021349|gb|EGI61723.1| Zinc finger FYVE domain-containing protein 1 [Acromyrmex echinatior]
gi|307194123|gb|EFN76571.1| Copper-transporting ATPase 1 [Harpegnathos saltator]									gi|322794499|gb|EFZ17552.1| hypothetical protein SINV_07097 [Solenopsis invicta]
gi|571519613|ref|XP_006564059.1| PREDICTED: phosphatase and actin regulator 4 isoform X5 [Apis mellifera]									gi|332021083|gb|EGI61470.1| Syntenin-1 [Acromyrmex echinatior]
gi|322794045|gb|EFZ17261.1| hypothetical protein SINV_01845 [Solenopsis invicta]									gi|332023061|gb|EGI63326.1| Tuberin [Acromyrmex echinatior]
gi|307180390|gb|EFN68416.1| Neurofibromin [Camponotus floridanus]									gi|607362096|gb|EZA56356.1| putative tRNA threonylcarbamoyladenosine biosynthesis protein osgep [Cerapachys biroi]
gi|332029099|gb|EGI69113.1| Biorientation of chromosomes in cell division protein 1-like protein [Acromyrmex echinatior]									gi|322787031|gb|EFZ13255.1| hypothetical protein SINV_10430 [Solenopsis invicta]
gi|332027967|gb|EGI68018.1| Gastrula zinc finger protein 5-1 [Acromyrmex echinatior]									gi|322798634|gb|EFZ20238.1| hypothetical protein SINV_09639 [Solenopsis invicta]
gi|332025093|gb|EGI65274.1| Protein hunchback [Acromyrmex echinatior]									gi|383857865|ref|XP_003704424.1| PREDICTED: uncharacterized protein LOC100878076 [Megachile rotundata]
gi|383849890|ref|XP_003700567.1| PREDICTED: potassium voltage-gated channel protein eag-like [Megachile rotundata]									gi|332029968|gb|EGI69793.1| hypothetical protein G5I_01336 [Acromyrmex echinatior]
gi|332025125|gb|EGI65305.1| Cytochrome b5 reductase 4 [Acromyrmex echinatior]									gi|322795981|gb|EFZ18605.1| hypothetical protein SINV_01964 [Solenopsis invicta]
gi|332028624|gb|EGI68659.1| WD and tetratricopeptide repeats protein 1 [Acromyrmex echinatior]									gi|322800156|gb|EFZ21241.1| hypothetical protein SINV_01535 [Solenopsis invicta]
gi|332024523|gb|EGI64721.1| Pre-rRNA-processing protein TSR1-like protein [Acromyrmex echinatior]									gi|307184873|gb|EFN71151.1| Mite allergen Der p 3 [Camponotus floridanus]
gi|322778939|gb|EFZ09353.1| hypothetical protein SINV_03278 [Solenopsis invicta]									gi|332025816|gb|EGI65973.1| X-linked retinitis pigmentosa GTPase regulator [Acromyrmex echinatior]
gi|607363562|gb|EZA57794.1| hypothetical protein X777_00896 [Cerapachys biroi]
gi|307195790|gb|EFN77604.1| Lysosome membrane protein 2 [Harpegnathos saltator]
gi|322792852|gb|EFZ16685.1| hypothetical protein SINV_10130 [Solenopsis invicta]
gi|332026109|gb|EGI66257.1| Rho GTPase-activating protein 20 [Acromyrmex echinatior]
gi|307183988|gb|EFN70559.1| WD repeat-containing protein 37 [Camponotus floridanus]
gi|332018900|gb|EGI59446.1| Transcriptional repressor scratch 2 [Acromyrmex echinatior]
gi|332023976|gb|EGI64194.1| Protein ITFG3 [Acromyrmex echinatior]
gi|322785452|gb|EFZ12123.1| hypothetical protein SINV_07398 [Solenopsis invicta]
gi|332031284|gb|EGI70812.1| Mitochondrial enolase superfamily member 1 [Acromyrmex echinatior]
gi|340709362|ref|XP_003393279.1| PREDICTED: trace amine-associated receptor 8b-like [Bombus terrestris]
gi|332028485|gb|EGI68526.1| Superoxide dismutase [Cu-Zn], chloroplastic [Acromyrmex echinatior]
gi|322780408|gb|EFZ09896.1| hypothetical protein SINV_03206 [Solenopsis invicta]
gi|322801939|gb|EFZ22486.1| hypothetical protein SINV_00170 [Solenopsis invicta]
gi|332026878|gb|EGI66979.1| YEATS domain-containing protein 2 [Acromyrmex echinatior]
gi|307191458|gb|EFN74999.1| Vacuolar protein sorting-associated protein 13A [Camponotus floridanus]
gi|383859913|ref|XP_003705436.1| PREDICTED: calpain-B-like isoform 1 [Megachile rotundata]
gi|332022138|gb|EGI62460.1| Protein neuralized [Acromyrmex echinatior]
gi|332027388|gb|EGI67471.1| Dolichol kinase [Acromyrmex echinatior]
gi|307176273|gb|EFN65904.1| Alpha-mannosidase 2 [Camponotus floridanus]
gi|332026263|gb|EGI66402.1| RING finger protein 17 [Acromyrmex echinatior]
gi|322792299|gb|EFZ16283.1| hypothetical protein SINV_03457 [Solenopsis invicta]
gi|332029806|gb|EGI69675.1| hypothetical protein G5I_01582 [Acromyrmex echinatior]
gi|332019295|gb|EGI59803.1| Sugar transporter ERD6-like 7 [Acromyrmex echinatior]
gi|332021627|gb|EGI61986.1| MPN domain-containing protein [Acromyrmex echinatior]
gi|332030227|gb|EGI70010.1| ATPase family AAA domain-containing protein 5 [Acromyrmex echinatior]
gi|332023210|gb|EGI63466.1| NCK-interacting protein with SH3 domain [Acromyrmex echinatior]
gi|332027618|gb|EGI67688.1| DNA-binding protein RFX7 [Acromyrmex echinatior]
gi|307194255|gb|EFN76651.1| Matrix metalloproteinase-14 [Harpegnathos saltator]
gi|322788784|gb|EFZ14352.1| hypothetical protein SINV_04467 [Solenopsis invicta]
gi|307176412|gb|EFN65986.1| Protein diaphanous [Camponotus floridanus]
gi|340728384|ref|XP_003402505.1| PREDICTED: hypothetical protein LOC100642668 [Bombus terrestris]
gi|332020645|gb|EGI61051.1| Protein zer-1-like protein [Acromyrmex echinatior]
gi|332020633|gb|EGI61040.1| C2 domain-containing protein 3 [Acromyrmex echinatior]
gi|322784371|gb|EFZ11342.1| hypothetical protein SINV_03492 [Solenopsis invicta]
gi|332024128|gb|EGI64344.1| Tyrosine-protein phosphatase 10D [Acromyrmex echinatior]
gi|332019898|gb|EGI60359.1| Receptor-type tyrosine-protein phosphatase N2 [Acromyrmex echinatior]
gi|322799521|gb|EFZ20829.1| hypothetical protein SINV_10169 [Solenopsis invicta]
gi|307173242|gb|EFN64295.1| Glucosamine--fructose-6-phosphate aminotransferase [isomerizing] 2 [Camponotus floridanus]
gi|607366079|gb|EZA60250.1| Dipeptidyl peptidase [Cerapachys biroi]
gi|332026786|gb|EGI66895.1| Annulin [Acromyrmex echinatior]
gi|607360340|gb|EZA54671.1| Choline O-acetyltransferase [Cerapachys biroi]
gi|332031508|gb|EGI70980.1| NudC domain-containing protein 1 [Acromyrmex echinatior]
gi|332018798|gb|EGI59359.1| Cyclin-L1 [Acromyrmex echinatior]
gi|332022829|gb|EGI63102.1| hypothetical protein G5I_08549 [Acromyrmex echinatior]
gi|322780593|gb|EFZ09977.1| hypothetical protein SINV_12881 [Solenopsis invicta]
gi|307166916|gb|EFN60820.1| RING and PHD-finger domain-containing protein KIAA1542 [Camponotus floridanus]
gi|645010644|ref|XP_008213553.1| PREDICTED: serine/threonine-protein kinase MARK2-like isoform X10 [Nasonia vitripennis] >gi|645010647|ref|XP_008213554.1| PREDICTED: serine/threonine-protein kinase MARK2-like isoform X10 [Nasonia vitripennis] >gi|645010650|ref|XP_008213555.1| PREDICTED: serine/threonine-protein kinase MARK2-like isoform X10 [Nasonia vitripennis]
gi|332028893|gb|EGI68915.1| Zinc finger protein 358 [Acromyrmex echinatior]
gi|307175603|gb|EFN65512.1| hypothetical protein EAG_10300 [Camponotus floridanus]
gi|332030674|gb|EGI70362.1| Arginyl-tRNA synthetase, cytoplasmic [Acromyrmex echinatior]
gi|332030031|gb|EGI69856.1| X-linked retinitis pigmentosa GTPase regulator-like protein [Acromyrmex echinatior]
gi|332030153|gb|EGI69947.1| Putative Rho GTPase-activating protein [Acromyrmex echinatior]
gi|607368385|gb|EZA62498.1| High affinity cGMP-specific 3',5'-cyclic phosphodiesterase 9A [Cerapachys biroi]
gi|332025578|gb|EGI65741.1| Receptor-type tyrosine-protein phosphatase beta [Acromyrmex echinatior]
gi|332017502|gb|EGI58222.1| hypothetical protein G5I_13695 [Acromyrmex echinatior]
gi|332028322|gb|EGI68369.1| Exportin-4 [Acromyrmex echinatior]
gi|322789179|gb|EFZ14565.1| hypothetical protein SINV_11515 [Solenopsis invicta]
gi|332024497|gb|EGI64695.1| Myelin gene regulatory factor [Acromyrmex echinatior]
gi|322788189|gb|EFZ13971.1| hypothetical protein SINV_08318 [Solenopsis invicta]
gi|332023071|gb|EGI63336.1| Protein TRC8-like protein [Acromyrmex echinatior]
gi|332028992|gb|EGI69006.1| ATP-dependent RNA helicase vasa [Acromyrmex echinatior]
gi|332020668|gb|EGI61074.1| Omega-amidase NIT2 [Acromyrmex echinatior]
gi|332024905|gb|EGI65093.1| DE-cadherin [Acromyrmex echinatior]
gi|607367365|gb|EZA61512.1| hypothetical protein X777_07845 [Cerapachys biroi]
gi|322794757|gb|EFZ17704.1| hypothetical protein SINV_02546 [Solenopsis invicta]
gi|332022348|gb|EGI62660.1| Angiotensin-converting enzyme [Acromyrmex echinatior]
gi|332024107|gb|EGI64323.1| Recombination repair protein 1 [Acromyrmex echinatior]
gi|322798375|gb|EFZ20099.1| hypothetical protein SINV_06790 [Solenopsis invicta]
gi|332022776|gb|EGI63049.1| DNA-dependent protein kinase catalytic subunit [Acromyrmex echinatior]
gi|332024495|gb|EGI64693.1| Receptor-type tyrosine-protein phosphatase R [Acromyrmex echinatior]
gi|307183173|gb|EFN70082.1| Nucleoprotein TPR [Camponotus floridanus]
gi|307183170|gb|EFN70079.1| Neurabin-1 [Camponotus floridanus]
gi|332023828|gb|EGI64052.1| Fibrillin-3 [Acromyrmex echinatior]
gi|307186388|gb|EFN72022.1| Breast cancer type 2 susceptibility protein-like protein [Camponotus floridanus]
gi|332022382|gb|EGI62694.1| Anaphase-promoting complex subunit 5 [Acromyrmex echinatior]
gi|322778760|gb|EFZ09176.1| hypothetical protein SINV_03430 [Solenopsis invicta]
gi|332018156|gb|EGI58762.1| Synaptotagmin 1 [Acromyrmex echinatior]
gi|322784375|gb|EFZ11346.1| hypothetical protein SINV_04299 [Solenopsis invicta]
gi|322783217|gb|EFZ10803.1| hypothetical protein SINV_06224 [Solenopsis invicta]
gi|322796014|gb|EFZ18638.1| hypothetical protein SINV_10407 [Solenopsis invicta]
gi|332018155|gb|EGI58761.1| Fibroblast growth factor receptor substrate 2 [Acromyrmex echinatior]
gi|332022740|gb|EGI63016.1| BTB/POZ domain-containing protein 8 [Acromyrmex echinatior]
gi|332024679|gb|EGI64872.1| Nischarin [Acromyrmex echinatior]
gi|322785350|gb|EFZ12024.1| hypothetical protein SINV_09539 [Solenopsis invicta]
gi|332030095|gb|EGI69920.1| E3 ubiquitin-protein ligase [Acromyrmex echinatior]
gi|322801998|gb|EFZ22535.1| hypothetical protein SINV_05735 [Solenopsis invicta]
gi|332024524|gb|EGI64722.1| DnaJ-like protein subfamily C member 14 [Acromyrmex echinatior]
gi|322783222|gb|EFZ10808.1| hypothetical protein SINV_06875 [Solenopsis invicta]
gi|332021887|gb|EGI62223.1| Protein tamozhennic [Acromyrmex echinatior]
gi|332022965|gb|EGI63231.1| S1 RNA-binding domain-containing protein 1 [Acromyrmex echinatior]
gi|332016239|gb|EGI57152.1| RNA-binding protein squid [Acromyrmex echinatior]
gi|332023428|gb|EGI63671.1| Zinc finger RNA-binding protein [Acromyrmex echinatior]
gi|307184245|gb|EFN70718.1| DNA topoisomerase 3-beta-1 [Camponotus floridanus]
gi|607368463|gb|EZA62576.1| Putative phosphoenolpyruvate synthase [Cerapachys biroi]
gi|607361750|gb|EZA56025.1| Fanconi anemia group J protein-like protein [Cerapachys biroi]
gi|322801460|gb|EFZ22121.1| hypothetical protein SINV_07959 [Solenopsis invicta]
gi|307182568|gb|EFN69761.1| 26S proteasome non-ATPase regulatory subunit 4 [Camponotus floridanus]
gi|332016569|gb|EGI57450.1| Mediator of DNA damage checkpoint protein 1 [Acromyrmex echinatior]
gi|332026696|gb|EGI66805.1| F-box only protein 11 [Acromyrmex echinatior]
gi|332016538|gb|EGI57419.1| Basic fibroblast growth factor receptor 1 [Acromyrmex echinatior]
gi|307214967|gb|EFN89812.1| hypothetical protein EAI_14002 [Harpegnathos saltator]
gi|332024092|gb|EGI64309.1| Cytochrome b5 [Acromyrmex echinatior]
gi|607352533|gb|EZA47473.1| Trafficking protein particle complex subunit [Cerapachys biroi]
gi|307179392|gb|EFN67722.1| Transcription initiation factor IIB [Camponotus floridanus]
gi|332024274|gb|EGI64476.1| Fibroblast growth factor receptor-like protein 1 [Acromyrmex echinatior]
gi|322792670|gb|EFZ16544.1| hypothetical protein SINV_10183 [Solenopsis invicta]
gi|607366359|gb|EZA60529.1| WD repeat-containing protein [Cerapachys biroi]
gi|332028618|gb|EGI68653.1| BTB/POZ domain-containing protein 3 [Acromyrmex echinatior]
gi|322801923|gb|EFZ22476.1| hypothetical protein SINV_09234 [Solenopsis invicta]
gi|332023826|gb|EGI64050.1| Round spermatid basic protein 1-like protein [Acromyrmex echinatior]
gi|332017479|gb|EGI58202.1| Low-density lipoprotein receptor-related protein 6 [Acromyrmex echinatior]
gi|332019648|gb|EGI60122.1| DnaJ-like protein subfamily C member 8 [Acromyrmex echinatior]
gi|332016531|gb|EGI57412.1| Leucine-rich repeat-containing protein 49 [Acromyrmex echinatior]
gi|322800819|gb|EFZ21694.1| hypothetical protein SINV_09245 [Solenopsis invicta]
gi|332016434|gb|EGI57347.1| hypothetical protein G5I_14818 [Acromyrmex echinatior]
gi|332030591|gb|EGI70279.1| hypothetical protein G5I_01038 [Acromyrmex echinatior]
gi|322801622|gb|EFZ22263.1| hypothetical protein SINV_10702 [Solenopsis invicta]
gi|332025826|gb|EGI65983.1| Blood vessel epicardial substance [Acromyrmex echinatior]
gi|322802325|gb|EFZ22721.1| hypothetical protein SINV_12919 [Solenopsis invicta]
gi|322794237|gb|EFZ17413.1| hypothetical protein SINV_07588 [Solenopsis invicta]
gi|322800453|gb|EFZ21457.1| hypothetical protein SINV_10940 [Solenopsis invicta]
gi|332030033|gb|EGI69858.1| CCR4-NOT transcription complex subunit 10 [Acromyrmex echinatior]
gi|332022361|gb|EGI62673.1| ATP-dependent RNA helicase Ddx1 [Acromyrmex echinatior]
gi|332021642|gb|EGI62001.1| Nitric oxide synthase, salivary gland [Acromyrmex echinatior]
gi|307183293|gb|EFN70162.1| Eukaryotic translation initiation factor 3 subunit M [Camponotus floridanus]
gi|332021864|gb|EGI62200.1| Nucleolar protein 11 [Acromyrmex echinatior]
gi|307189412|gb|EFN73822.1| OTU domain-containing protein 4 [Camponotus floridanus]
gi|332029571|gb|EGI69460.1| Integrator complex subunit 1 [Acromyrmex echinatior]
gi|332023103|gb|EGI63364.1| Putative ATP-dependent RNA helicase DDX23 [Acromyrmex echinatior]
gi|332018788|gb|EGI59349.1| Nuclear receptor coactivator 5 [Acromyrmex echinatior]
gi|322801510|gb|EFZ22171.1| hypothetical protein SINV_12925 [Solenopsis invicta]
gi|332018435|gb|EGI59029.1| LIM/homeobox protein Lhx3 [Acromyrmex echinatior]
gi|607360775|gb|EZA55096.1| hypothetical protein X777_05351, partial [Cerapachys biroi]
gi|332031502|gb|EGI70974.1| Protein TRS85-like protein [Acromyrmex echinatior]
gi|332024173|gb|EGI64388.1| hypothetical protein G5I_07193 [Acromyrmex echinatior]
gi|332029549|gb|EGI69438.1| Nephrin [Acromyrmex echinatior]
gi|307212379|gb|EFN88171.1| UPF0550 protein C7orf28-like protein [Harpegnathos saltator]
gi|332020685|gb|EGI61091.1| THO complex subunit 5-like protein [Acromyrmex echinatior]
gi|307188080|gb|EFN72912.1| Broad-complex core protein isoform 6 [Camponotus floridanus]
gi|332018729|gb|EGI59300.1| Circadian clock-controlled protein [Acromyrmex echinatior]
gi|332027767|gb|EGI67834.1| Esterase FE4 [Acromyrmex echinatior]
gi|332028596|gb|EGI68633.1| Isthmin [Acromyrmex echinatior]
gi|332020812|gb|EGI61210.1| Centromere-associated protein E [Acromyrmex echinatior]
gi|307198065|gb|EFN79118.1| Tetraspanin-3 [Harpegnathos saltator]
gi|332024112|gb|EGI64328.1| Waprin-Phi1 [Acromyrmex echinatior]
gi|332027370|gb|EGI67453.1| Cysteine-rich protein 2-binding protein [Acromyrmex echinatior]
gi|332016527|gb|EGI57408.1| DnaJ-like protein subfamily C member 13 [Acromyrmex echinatior]
gi|332025132|gb|EGI65312.1| hypothetical protein G5I_06171 [Acromyrmex echinatior]
gi|307185193|gb|EFN71330.1| Putative GPI-anchor transamidase [Camponotus floridanus]
gi|322785355|gb|EFZ12029.1| hypothetical protein SINV_11931 [Solenopsis invicta]
gi|332021880|gb|EGI62216.1| Homocysteine-responsive endoplasmic reticulum-resident ubiquitin-like domain member 2 protein [Acromyrmex echinatior]
gi|383849418|ref|XP_003700342.1| PREDICTED: THAP domain-containing protein 8-like [Megachile rotundata]
gi|322796760|gb|EFZ19193.1| hypothetical protein SINV_16140 [Solenopsis invicta]
gi|322799222|gb|EFZ20637.1| hypothetical protein SINV_06026 [Solenopsis invicta]
gi|340713345|ref|XP_003395205.1| PREDICTED: zinc finger protein 721-like [Bombus terrestris]
gi|307189723|gb|EFN74016.1| Dopamine D2-like receptor [Camponotus floridanus]
gi|332027992|gb|EGI68043.1| hypothetical protein G5I_03137 [Acromyrmex echinatior]
gi|307178088|gb|EFN66915.1| Transmembrane protein C2orf18 [Camponotus floridanus]
gi|332018745|gb|EGI59310.1| hypothetical protein G5I_12515 [Acromyrmex echinatior]
gi|607360750|gb|EZA55074.1| Chitobiosyldiphosphodolichol beta-mannosyltransferase [Cerapachys biroi]
gi|332030022|gb|EGI69847.1| RNA methyltransferase-like protein 1 [Acromyrmex echinatior]
gi|332024944|gb|EGI65131.1| hypothetical protein G5I_06309 [Acromyrmex echinatior]
gi|332021660|gb|EGI62019.1| DOMON domain-containing protein [Acromyrmex echinatior]
gi|607362469|gb|EZA56721.1| Venom phospholipase A1 [Cerapachys biroi]
gi|607367294|gb|EZA61441.1| hypothetical protein X777_07774 [Cerapachys biroi]
gi|322801864|gb|EFZ22436.1| hypothetical protein SINV_10615 [Solenopsis invicta]

## Sheet: dul-longi
52 elements included exclusively in "T.dul":								34 elements included exclusively in "T.longi":								5 common elements in "T.dul" and "T.longi":
gi|322801079|gb|EFZ21832.1| hypothetical protein SINV_03497 [Solenopsis invicta]								gi|607364554|gb|EZA58766.1| Leukotriene A-4 hydrolase [Cerapachys biroi]								gi|332023970|gb|EGI64188.1| hypothetical protein G5I_07348 [Acromyrmex echinatior]
gi|322792404|gb|EFZ16388.1| hypothetical protein SINV_11844 [Solenopsis invicta]								gi|307176323|gb|EFN65942.1| Afadin [Camponotus floridanus]								gi|332017838|gb|EGI58498.1| 3-hydroxy-3-methylglutaryl-coenzyme A reductase [Acromyrmex echinatior]
gi|571532890|ref|XP_006560791.1| PREDICTED: microtubule-associated protein futsch isoform X2 [Apis mellifera]								gi|332025498|gb|EGI65661.1| Cytoskeleton-associated protein 5 [Acromyrmex echinatior]								gi|307166565|gb|EFN60628.1| hypothetical protein EAG_05356 [Camponotus floridanus]
gi|332030215|gb|EGI69998.1| Alpha-catulin [Acromyrmex echinatior]								gi|322786591|gb|EFZ12986.1| hypothetical protein SINV_04324 [Solenopsis invicta]								gi|332021632|gb|EGI61991.1| Small subunit processome component 20-like protein [Acromyrmex echinatior]
gi|665811977|ref|XP_008554483.1| PREDICTED: casein kinase I isoform gamma-3 isoform X4 [Microplitis demolitor]								gi|350408136|ref|XP_003488316.1| PREDICTED: beta-amyloid-like protein-like [Bombus impatiens]								gi|332027430|gb|EGI67513.1| Zinc finger protein jing-like protein [Acromyrmex echinatior]
gi|322800185|gb|EFZ21270.1| hypothetical protein SINV_08341 [Solenopsis invicta]								gi|332023742|gb|EGI63966.1| Actin-binding LIM protein 1 [Acromyrmex echinatior]
gi|332019302|gb|EGI59810.1| Thyrotropin-releasing hormone-degrading ectoenzyme [Acromyrmex echinatior]								gi|322778729|gb|EFZ09145.1| hypothetical protein SINV_01483 [Solenopsis invicta]
gi|322786633|gb|EFZ13028.1| hypothetical protein SINV_80320 [Solenopsis invicta]								gi|322778999|gb|EFZ09403.1| hypothetical protein SINV_02780 [Solenopsis invicta]
gi|332028985|gb|EGI68999.1| Ferrochelatase, mitochondrial [Acromyrmex echinatior]								gi|332022728|gb|EGI63004.1| Zinc finger protein 91 [Acromyrmex echinatior]
gi|307176984|gb|EFN66290.1| Dosage compensation regulator [Camponotus floridanus]								gi|307191532|gb|EFN75035.1| Glutaminase kidney isoform, mitochondrial [Camponotus floridanus]
gi|607356023|gb|EZA50569.1| SH3 domain-containing RING finger protein [Cerapachys biroi]								gi|322797458|gb|EFZ19529.1| hypothetical protein SINV_05269 [Solenopsis invicta]
gi|322796595|gb|EFZ19069.1| hypothetical protein SINV_12600 [Solenopsis invicta]								gi|322802442|gb|EFZ22792.1| hypothetical protein SINV_08137 [Solenopsis invicta]
gi|332023906|gb|EGI64126.1| Pleckstrin-like proteiny domain-containing family M member 2 [Acromyrmex echinatior]								gi|332030934|gb|EGI70560.1| Glutamyl aminopeptidase [Acromyrmex echinatior]
gi|332030080|gb|EGI69905.1| Splicing factor, arginine/serine-rich 18 [Acromyrmex echinatior]								gi|332027618|gb|EGI67688.1| DNA-binding protein RFX7 [Acromyrmex echinatior]
gi|332025721|gb|EGI65879.1| F-box/LRR-repeat protein 20 [Acromyrmex echinatior]								gi|307200373|gb|EFN80616.1| RAB6IP1-like protein [Harpegnathos saltator]
gi|332023474|gb|EGI63717.1| hypothetical protein G5I_07956 [Acromyrmex echinatior]								gi|572299478|ref|XP_006615869.1| PREDICTED: amphiphysin-like isoform X4 [Apis dorsata]
gi|307180439|gb|EFN68465.1| Synaptotagmin-6 [Camponotus floridanus]								gi|332019825|gb|EGI60286.1| hypothetical protein G5I_11468 [Acromyrmex echinatior]
gi|607363466|gb|EZA57698.1| EH domain-binding protein [Cerapachys biroi]								gi|332030506|gb|EGI70194.1| Thioredoxin reductase 1, mitochondrial [Acromyrmex echinatior]
gi|307175830|gb|EFN65645.1| Tetraspanin-31 [Camponotus floridanus]								gi|332018469|gb|EGI59059.1| Esterase FE4 [Acromyrmex echinatior]
gi|332023546|gb|EGI63782.1| Mediator of RNA polymerase II transcription subunit 23 [Acromyrmex echinatior]								gi|332026456|gb|EGI66584.1| Transcription initiation factor TFIID subunit 4 [Acromyrmex echinatior]
gi|332023053|gb|EGI63318.1| Growth inhibition and differentiation-related protein 88-like protein [Acromyrmex echinatior]								gi|332028329|gb|EGI68376.1| T-box protein 2 [Acromyrmex echinatior]
gi|332023156|gb|EGI63412.1| Rho guanine nucleotide exchange factor 7 [Acromyrmex echinatior]								gi|332019281|gb|EGI59790.1| Mitogen-activated protein kinase kinase kinase 12 [Acromyrmex echinatior]
gi|322798377|gb|EFZ20101.1| hypothetical protein SINV_07690 [Solenopsis invicta]								gi|307183173|gb|EFN70082.1| Nucleoprotein TPR [Camponotus floridanus]
gi|332023936|gb|EGI64154.1| Phospholipase DDHD1 [Acromyrmex echinatior]								gi|332029699|gb|EGI69578.1| Intraflagellar transport protein 140-like protein [Acromyrmex echinatior]
gi|607353539|gb|EZA48284.1| Tyrosine-protein kinase Fps85D [Cerapachys biroi]								gi|332022845|gb|EGI63118.1| U3 small nucleolar RNA-associated protein 15-like protein [Acromyrmex echinatior]
gi|322788782|gb|EFZ14350.1| hypothetical protein SINV_03929 [Solenopsis invicta]								gi|322802768|gb|EFZ22980.1| hypothetical protein SINV_06819 [Solenopsis invicta]
gi|571508090|ref|XP_006571280.1| PREDICTED: potassium voltage-gated channel protein Shal isoform X5 [Apis mellifera]								gi|332023061|gb|EGI63326.1| Tuberin [Acromyrmex echinatior]
gi|322800036|gb|EFZ21142.1| hypothetical protein SINV_01145 [Solenopsis invicta]								gi|332030691|gb|EGI70368.1| Adenomatous polyposis coli protein [Acromyrmex echinatior]
gi|332026435|gb|EGI66563.1| Disks large-associated protein 5 [Acromyrmex echinatior]								gi|322778710|gb|EFZ09126.1| hypothetical protein SINV_00178 [Solenopsis invicta]
gi|332022411|gb|EGI62719.1| Stromal membrane-associated protein 1 [Acromyrmex echinatior]								gi|332024969|gb|EGI65156.1| Immunoglobulin superfamily member 10 [Acromyrmex echinatior]
gi|332020662|gb|EGI61068.1| Pre-mRNA-splicing factor 38B [Acromyrmex echinatior]								gi|607359898|gb|EZA54251.1| Flotillin-1 [Cerapachys biroi]
gi|332018514|gb|EGI59104.1| Zinc finger protein 474 [Acromyrmex echinatior]								gi|607361944|gb|EZA56205.1| Trypsin-1 [Cerapachys biroi]
gi|332023872|gb|EGI64096.1| Major facilitator superfamily domain-containing protein 6 [Acromyrmex echinatior]								gi|322787067|gb|EFZ13291.1| hypothetical protein SINV_14462 [Solenopsis invicta]
gi|307177840|gb|EFN66803.1| USP6 N-terminal-like protein [Camponotus floridanus]								gi|576938482|dbj|BAO48212.1| Kazal-type proteinase inhibitor [Camponotus japonicus]
gi|572299678|ref|XP_006615959.1| PREDICTED: RNA-binding protein fusilli-like isoform X1 [Apis dorsata]
gi|332019603|gb|EGI60081.1| Sphingomyelin phosphodiesterase [Acromyrmex echinatior]
gi|322794510|gb|EFZ17563.1| hypothetical protein SINV_12524 [Solenopsis invicta]
gi|332023056|gb|EGI63321.1| hypothetical protein G5I_08350 [Acromyrmex echinatior]
gi|322787479|gb|EFZ13567.1| hypothetical protein SINV_10895 [Solenopsis invicta]
gi|380028288|ref|XP_003697838.1| PREDICTED: hepatic leukemia factor-like [Apis florea] >gi|571570141|ref|XP_006560301.1| PREDICTED: hepatic leukemia factor isoform X6 [Apis mellifera] >gi|572300182|ref|XP_006616198.1| PREDICTED: hepatic leukemia factor-like isoform X2 [Apis dorsata]
gi|607353921|gb|EZA48611.1| Serine/threonine-protein kinase [Cerapachys biroi]
gi|332027974|gb|EGI68025.1| Exocyst complex component 5 [Acromyrmex echinatior]
gi|332018729|gb|EGI59300.1| Circadian clock-controlled protein [Acromyrmex echinatior]
gi|322802337|gb|EFZ22733.1| hypothetical protein SINV_14859 [Solenopsis invicta]
gi|322802265|gb|EFZ22661.1| hypothetical protein SINV_04091 [Solenopsis invicta]
gi|322787264|gb|EFZ13400.1| hypothetical protein SINV_02203 [Solenopsis invicta]
gi|322779058|gb|EFZ09452.1| hypothetical protein SINV_04023 [Solenopsis invicta]
gi|332026722|gb|EGI66831.1| WD repeat-containing protein 20 [Acromyrmex echinatior]
gi|332030169|gb|EGI69963.1| Protein rhomboid [Acromyrmex echinatior]
gi|332022509|gb|EGI62812.1| CTL-like protein 1 [Acromyrmex echinatior]
gi|307180196|gb|EFN68229.1| hypothetical protein EAG_13140 [Camponotus floridanus]
gi|571511387|ref|XP_006559191.1| PREDICTED: ferredoxin isoform X1 [Apis mellifera]

## Sheet: dul-ambi
56 elements included exclusively in "T.dul":								44 elements included exclusively in "T.ambi":								1 common element in "T.dul" and "T.ambi":
gi|322801079|gb|EFZ21832.1| hypothetical protein SINV_03497 [Solenopsis invicta]								gi|322798669|gb|EFZ20273.1| hypothetical protein SINV_16002 [Solenopsis invicta]								gi|332023056|gb|EGI63321.1| hypothetical protein G5I_08350 [Acromyrmex echinatior]
gi|332023970|gb|EGI64188.1| hypothetical protein G5I_07348 [Acromyrmex echinatior]								gi|572258175|ref|XP_006607474.1| PREDICTED: plasma membrane calcium-transporting ATPase 3-like isoform X1 [Apis dorsata] >gi|572258177|ref|XP_006607475.1| PREDICTED: plasma membrane calcium-transporting ATPase 3-like isoform X2 [Apis dorsata] >gi|572258179|ref|XP_006607476.1| PREDICTED: plasma membrane calcium-transporting ATPase 3-like isoform X3 [Apis dorsata] >gi|572258181|ref|XP_006607477.1| …
gi|322792404|gb|EFZ16388.1| hypothetical protein SINV_11844 [Solenopsis invicta]								gi|332027429|gb|EGI67512.1| SH3 and multiple ankyrin repeat domains protein 3 [Acromyrmex echinatior]
gi|571532890|ref|XP_006560791.1| PREDICTED: microtubule-associated protein futsch isoform X2 [Apis mellifera]								gi|332023177|gb|EGI63433.1| hypothetical protein G5I_08161 [Acromyrmex echinatior]
gi|332030215|gb|EGI69998.1| Alpha-catulin [Acromyrmex echinatior]								gi|607367070|gb|EZA61226.1| Cysteinyl-tRNA synthetase, cytoplasmic [Cerapachys biroi]
gi|665811977|ref|XP_008554483.1| PREDICTED: casein kinase I isoform gamma-3 isoform X4 [Microplitis demolitor]								gi|332018334|gb|EGI58939.1| Relaxin receptor 1 [Acromyrmex echinatior]
gi|322800185|gb|EFZ21270.1| hypothetical protein SINV_08341 [Solenopsis invicta]								gi|322799522|gb|EFZ20830.1| hypothetical protein SINV_10379 [Solenopsis invicta]
gi|332019302|gb|EGI59810.1| Thyrotropin-releasing hormone-degrading ectoenzyme [Acromyrmex echinatior]								gi|332027809|gb|EGI67874.1| E3 ubiquitin-protein ligase [Acromyrmex echinatior]
gi|322786633|gb|EFZ13028.1| hypothetical protein SINV_80320 [Solenopsis invicta]								gi|332018827|gb|EGI59386.1| Putative RNA-binding protein EEED8.10 [Acromyrmex echinatior]
gi|332028985|gb|EGI68999.1| Ferrochelatase, mitochondrial [Acromyrmex echinatior]								gi|332023475|gb|EGI63718.1| Collagen alpha-1(XXI) chain [Acromyrmex echinatior]
gi|307176984|gb|EFN66290.1| Dosage compensation regulator [Camponotus floridanus]								gi|307204530|gb|EFN83210.1| Longitudinals lacking protein, isoform G [Harpegnathos saltator]
gi|607356023|gb|EZA50569.1| SH3 domain-containing RING finger protein [Cerapachys biroi]								gi|332018144|gb|EGI58753.1| Protein polybromo-1 [Acromyrmex echinatior]
gi|332017838|gb|EGI58498.1| 3-hydroxy-3-methylglutaryl-coenzyme A reductase [Acromyrmex echinatior]								gi|322793931|gb|EFZ17217.1| hypothetical protein SINV_80708 [Solenopsis invicta]
gi|307166565|gb|EFN60628.1| hypothetical protein EAG_05356 [Camponotus floridanus]								gi|340709272|ref|XP_003393235.1| PREDICTED: hypothetical protein LOC100649436 [Bombus terrestris]
gi|322796595|gb|EFZ19069.1| hypothetical protein SINV_12600 [Solenopsis invicta]								gi|332018938|gb|EGI59484.1| Serine/threonine-protein kinase ICK [Acromyrmex echinatior]
gi|332023906|gb|EGI64126.1| Pleckstrin-like proteiny domain-containing family M member 2 [Acromyrmex echinatior]								gi|332027274|gb|EGI67358.1| hypothetical protein G5I_04001 [Acromyrmex echinatior]
gi|332030080|gb|EGI69905.1| Splicing factor, arginine/serine-rich 18 [Acromyrmex echinatior]								gi|607363658|gb|EZA57890.1| Rho GTPase-activating protein [Cerapachys biroi]
gi|332025721|gb|EGI65879.1| F-box/LRR-repeat protein 20 [Acromyrmex echinatior]								gi|332020119|gb|EGI60563.1| Endoribonuclease Dcr-1 [Acromyrmex echinatior]
gi|332023474|gb|EGI63717.1| hypothetical protein G5I_07956 [Acromyrmex echinatior]								gi|383862169|ref|XP_003706556.1| PREDICTED: paired box protein Pax-6-like [Megachile rotundata]
gi|307180439|gb|EFN68465.1| Synaptotagmin-6 [Camponotus floridanus]								gi|607363545|gb|EZA57777.1| Serine/threonine-protein kinase 32B [Cerapachys biroi]
gi|607363466|gb|EZA57698.1| EH domain-binding protein [Cerapachys biroi]								gi|307179450|gb|EFN67774.1| Outer dense fiber protein 3 [Camponotus floridanus]
gi|307175830|gb|EFN65645.1| Tetraspanin-31 [Camponotus floridanus]								gi|332027382|gb|EGI67465.1| GON-4-like protein [Acromyrmex echinatior]
gi|332023546|gb|EGI63782.1| Mediator of RNA polymerase II transcription subunit 23 [Acromyrmex echinatior]								gi|307181255|gb|EFN68945.1| Solute carrier family 25 member 40 [Camponotus floridanus]
gi|332023053|gb|EGI63318.1| Growth inhibition and differentiation-related protein 88-like protein [Acromyrmex echinatior]								gi|350404867|ref|XP_003487245.1| PREDICTED: hypothetical protein LOC100741061 [Bombus impatiens]
gi|332023156|gb|EGI63412.1| Rho guanine nucleotide exchange factor 7 [Acromyrmex echinatior]								gi|332016792|gb|EGI57613.1| Golgi integral membrane protein 4 [Acromyrmex echinatior]
gi|322798377|gb|EFZ20101.1| hypothetical protein SINV_07690 [Solenopsis invicta]								gi|332024881|gb|EGI65069.1| Hexokinase type 2 [Acromyrmex echinatior]
gi|332023936|gb|EGI64154.1| Phospholipase DDHD1 [Acromyrmex echinatior]								gi|332022219|gb|EGI62534.1| Fanconi anemia group I protein-like protein [Acromyrmex echinatior]
gi|607353539|gb|EZA48284.1| Tyrosine-protein kinase Fps85D [Cerapachys biroi]								gi|322785634|gb|EFZ12289.1| hypothetical protein SINV_15897 [Solenopsis invicta]
gi|322788782|gb|EFZ14350.1| hypothetical protein SINV_03929 [Solenopsis invicta]								gi|332028336|gb|EGI68383.1| SEC14-like protein 2 [Acromyrmex echinatior]
gi|571508090|ref|XP_006571280.1| PREDICTED: potassium voltage-gated channel protein Shal isoform X5 [Apis mellifera]								gi|332021349|gb|EGI61723.1| Zinc finger FYVE domain-containing protein 1 [Acromyrmex echinatior]
gi|332021632|gb|EGI61991.1| Small subunit processome component 20-like protein [Acromyrmex echinatior]								gi|322794499|gb|EFZ17552.1| hypothetical protein SINV_07097 [Solenopsis invicta]
gi|322800036|gb|EFZ21142.1| hypothetical protein SINV_01145 [Solenopsis invicta]								gi|332021083|gb|EGI61470.1| Syntenin-1 [Acromyrmex echinatior]
gi|332026435|gb|EGI66563.1| Disks large-associated protein 5 [Acromyrmex echinatior]								gi|322796609|gb|EFZ19083.1| hypothetical protein SINV_80454 [Solenopsis invicta]
gi|332022411|gb|EGI62719.1| Stromal membrane-associated protein 1 [Acromyrmex echinatior]								gi|332023061|gb|EGI63326.1| Tuberin [Acromyrmex echinatior]
gi|332020662|gb|EGI61068.1| Pre-mRNA-splicing factor 38B [Acromyrmex echinatior]								gi|607362096|gb|EZA56356.1| putative tRNA threonylcarbamoyladenosine biosynthesis protein osgep [Cerapachys biroi]
gi|332018514|gb|EGI59104.1| Zinc finger protein 474 [Acromyrmex echinatior]								gi|322787031|gb|EFZ13255.1| hypothetical protein SINV_10430 [Solenopsis invicta]
gi|332023872|gb|EGI64096.1| Major facilitator superfamily domain-containing protein 6 [Acromyrmex echinatior]								gi|322798634|gb|EFZ20238.1| hypothetical protein SINV_09639 [Solenopsis invicta]
gi|307177840|gb|EFN66803.1| USP6 N-terminal-like protein [Camponotus floridanus]								gi|383857865|ref|XP_003704424.1| PREDICTED: uncharacterized protein LOC100878076 [Megachile rotundata]
gi|572299678|ref|XP_006615959.1| PREDICTED: RNA-binding protein fusilli-like isoform X1 [Apis dorsata]								gi|332029968|gb|EGI69793.1| hypothetical protein G5I_01336 [Acromyrmex echinatior]
gi|332019603|gb|EGI60081.1| Sphingomyelin phosphodiesterase [Acromyrmex echinatior]								gi|322795981|gb|EFZ18605.1| hypothetical protein SINV_01964 [Solenopsis invicta]
gi|322794510|gb|EFZ17563.1| hypothetical protein SINV_12524 [Solenopsis invicta]								gi|307184874|gb|EFN71152.1| Trypsin-7 [Camponotus floridanus]
gi|322787479|gb|EFZ13567.1| hypothetical protein SINV_10895 [Solenopsis invicta]								gi|322800156|gb|EFZ21241.1| hypothetical protein SINV_01535 [Solenopsis invicta]
gi|380028288|ref|XP_003697838.1| PREDICTED: hepatic leukemia factor-like [Apis florea] >gi|571570141|ref|XP_006560301.1| PREDICTED: hepatic leukemia factor isoform X6 [Apis mellifera] >gi|572300182|ref|XP_006616198.1| PREDICTED: hepatic leukemia factor-like isoform X2 [Apis dorsata]								gi|307184873|gb|EFN71151.1| Mite allergen Der p 3 [Camponotus floridanus]
gi|332027430|gb|EGI67513.1| Zinc finger protein jing-like protein [Acromyrmex echinatior]								gi|332025816|gb|EGI65973.1| X-linked retinitis pigmentosa GTPase regulator [Acromyrmex echinatior]
gi|607353921|gb|EZA48611.1| Serine/threonine-protein kinase [Cerapachys biroi]
gi|332027974|gb|EGI68025.1| Exocyst complex component 5 [Acromyrmex echinatior]
gi|332018729|gb|EGI59300.1| Circadian clock-controlled protein [Acromyrmex echinatior]
gi|322802337|gb|EFZ22733.1| hypothetical protein SINV_14859 [Solenopsis invicta]
gi|322802265|gb|EFZ22661.1| hypothetical protein SINV_04091 [Solenopsis invicta]
gi|322787264|gb|EFZ13400.1| hypothetical protein SINV_02203 [Solenopsis invicta]
gi|322779058|gb|EFZ09452.1| hypothetical protein SINV_04023 [Solenopsis invicta]
gi|332026722|gb|EGI66831.1| WD repeat-containing protein 20 [Acromyrmex echinatior]
gi|332030169|gb|EGI69963.1| Protein rhomboid [Acromyrmex echinatior]
gi|332022509|gb|EGI62812.1| CTL-like protein 1 [Acromyrmex echinatior]
gi|307180196|gb|EFN68229.1| hypothetical protein EAG_13140 [Camponotus floridanus]
gi|571511387|ref|XP_006559191.1| PREDICTED: ferredoxin isoform X1 [Apis mellifera]

## Sheet: pila-longi
38 elements included exclusively in "T.pila":								39 elements included exclusively in "T.longi":								0 common elements in "T.pila" and "T.longi":
gi|607362625|gb|EZA56872.1| Dual oxidase [Cerapachys biroi]								gi|607364554|gb|EZA58766.1| Leukotriene A-4 hydrolase [Cerapachys biroi]
gi|332027316|gb|EGI67400.1| Putative inorganic phosphate cotransporter [Acromyrmex echinatior]								gi|307176323|gb|EFN65942.1| Afadin [Camponotus floridanus]
gi|332019530|gb|EGI60009.1| Protein FAM38B [Acromyrmex echinatior]								gi|332023970|gb|EGI64188.1| hypothetical protein G5I_07348 [Acromyrmex echinatior]
gi|571531898|ref|XP_006570278.1| PREDICTED: broad-complex core protein isoforms 1/2/3/4/5 isoform X4 [Apis mellifera]								gi|332025498|gb|EGI65661.1| Cytoskeleton-associated protein 5 [Acromyrmex echinatior]
gi|607354125|gb|EZA48788.1| Voltage-dependent T-type calcium channel subunit alpha-1G, partial [Cerapachys biroi]								gi|322786591|gb|EFZ12986.1| hypothetical protein SINV_04324 [Solenopsis invicta]
gi|332022486|gb|EGI62793.1| Paired amphipathic helix protein Sin3a [Acromyrmex echinatior]								gi|350408136|ref|XP_003488316.1| PREDICTED: beta-amyloid-like protein-like [Bombus impatiens]
gi|332019684|gb|EGI60158.1| Dual specificity mitogen-activated protein kinase kinase 7 [Acromyrmex echinatior]								gi|332023742|gb|EGI63966.1| Actin-binding LIM protein 1 [Acromyrmex echinatior]
gi|307195629|gb|EFN77471.1| Cytosolic purine 5'-nucleotidase [Harpegnathos saltator]								gi|322778729|gb|EFZ09145.1| hypothetical protein SINV_01483 [Solenopsis invicta]
gi|607365914|gb|EZA60090.1| Zinc transporter ZIP1 [Cerapachys biroi]								gi|322778999|gb|EFZ09403.1| hypothetical protein SINV_02780 [Solenopsis invicta]
gi|332019506|gb|EGI59985.1| Ankyrin repeat and death domain-containing protein 1A [Acromyrmex echinatior]								gi|332022728|gb|EGI63004.1| Zinc finger protein 91 [Acromyrmex echinatior]
gi|332016885|gb|EGI57694.1| Uncharacterized protein [Acromyrmex echinatior]								gi|332017838|gb|EGI58498.1| 3-hydroxy-3-methylglutaryl-coenzyme A reductase [Acromyrmex echinatior]
gi|322785879|gb|EFZ12498.1| hypothetical protein SINV_12415 [Solenopsis invicta]								gi|307166565|gb|EFN60628.1| hypothetical protein EAG_05356 [Camponotus floridanus]
gi|332028062|gb|EGI68113.1| UPF0407 protein [Acromyrmex echinatior]								gi|307191532|gb|EFN75035.1| Glutaminase kidney isoform, mitochondrial [Camponotus floridanus]
gi|350411953|ref|XP_003489499.1| PREDICTED: contactin-5-like [Bombus impatiens]								gi|322797458|gb|EFZ19529.1| hypothetical protein SINV_05269 [Solenopsis invicta]
gi|332023053|gb|EGI63318.1| Growth inhibition and differentiation-related protein 88-like protein [Acromyrmex echinatior]								gi|322802442|gb|EFZ22792.1| hypothetical protein SINV_08137 [Solenopsis invicta]
gi|332019568|gb|EGI60047.1| RanBP-type and C3HC4-type zinc finger-containing protein 1 [Acromyrmex echinatior]								gi|332030934|gb|EGI70560.1| Glutamyl aminopeptidase [Acromyrmex echinatior]
gi|332027679|gb|EGI67747.1| Protein trachealess [Acromyrmex echinatior]								gi|332027618|gb|EGI67688.1| DNA-binding protein RFX7 [Acromyrmex echinatior]
gi|350425234|ref|XP_003494055.1| PREDICTED: hypothetical protein LOC100742880 [Bombus impatiens]								gi|307200373|gb|EFN80616.1| RAB6IP1-like protein [Harpegnathos saltator]
gi|332023388|gb|EGI63633.1| Neither inactivation nor afterpotential protein G [Acromyrmex echinatior]								gi|572299478|ref|XP_006615869.1| PREDICTED: amphiphysin-like isoform X4 [Apis dorsata]
gi|322801386|gb|EFZ22047.1| hypothetical protein SINV_02116 [Solenopsis invicta]								gi|332019825|gb|EGI60286.1| hypothetical protein G5I_11468 [Acromyrmex echinatior]
gi|332022366|gb|EGI62678.1| Engulfment and cell motility protein 1 [Acromyrmex echinatior]								gi|332030506|gb|EGI70194.1| Thioredoxin reductase 1, mitochondrial [Acromyrmex echinatior]
gi|322785436|gb|EFZ12107.1| hypothetical protein SINV_00022 [Solenopsis invicta]								gi|332018469|gb|EGI59059.1| Esterase FE4 [Acromyrmex echinatior]
gi|322790012|gb|EFZ15088.1| hypothetical protein SINV_09653 [Solenopsis invicta]								gi|332026456|gb|EGI66584.1| Transcription initiation factor TFIID subunit 4 [Acromyrmex echinatior]
gi|607355002|gb|EZA49598.1| T-complex protein 1 subunit eta [Cerapachys biroi]								gi|332028329|gb|EGI68376.1| T-box protein 2 [Acromyrmex echinatior]
gi|322802694|gb|EFZ22918.1| hypothetical protein SINV_06801 [Solenopsis invicta]								gi|332019281|gb|EGI59790.1| Mitogen-activated protein kinase kinase kinase 12 [Acromyrmex echinatior]
gi|340715053|ref|XP_003396035.1| PREDICTED: hypothetical protein LOC100648747 [Bombus terrestris]								gi|332021632|gb|EGI61991.1| Small subunit processome component 20-like protein [Acromyrmex echinatior]
gi|607364324|gb|EZA58536.1| Protein lap4 [Cerapachys biroi]								gi|307183173|gb|EFN70082.1| Nucleoprotein TPR [Camponotus floridanus]
gi|307168569|gb|EFN61627.1| Kelch-like protein 10 [Camponotus floridanus]								gi|332029699|gb|EGI69578.1| Intraflagellar transport protein 140-like protein [Acromyrmex echinatior]
gi|572271079|ref|XP_006613517.1| PREDICTED: alkaline phosphatase, tissue-nonspecific isozyme-like [Apis dorsata]								gi|332022845|gb|EGI63118.1| U3 small nucleolar RNA-associated protein 15-like protein [Acromyrmex echinatior]
gi|332023056|gb|EGI63321.1| hypothetical protein G5I_08350 [Acromyrmex echinatior]								gi|322802768|gb|EFZ22980.1| hypothetical protein SINV_06819 [Solenopsis invicta]
gi|607357636|gb|EZA52082.1| Harmonin [Cerapachys biroi]								gi|332023061|gb|EGI63326.1| Tuberin [Acromyrmex echinatior]
gi|571510716|ref|XP_006571795.1| PREDICTED: nucleolysin TIA-1 isoform p40-like isoform X1 [Apis mellifera]								gi|332030691|gb|EGI70368.1| Adenomatous polyposis coli protein [Acromyrmex echinatior]
gi|332029549|gb|EGI69438.1| Nephrin [Acromyrmex echinatior]								gi|322778710|gb|EFZ09126.1| hypothetical protein SINV_00178 [Solenopsis invicta]
gi|607353434|gb|EZA48197.1| Liprin-beta-1 [Cerapachys biroi]								gi|332024969|gb|EGI65156.1| Immunoglobulin superfamily member 10 [Acromyrmex echinatior]
gi|307184467|gb|EFN70870.1| Fatty acyl-CoA reductase 1 [Camponotus floridanus]								gi|607359898|gb|EZA54251.1| Flotillin-1 [Cerapachys biroi]
gi|332018110|gb|EGI58724.1| Mushroom body large-type Kenyon cell-specific protein 1 [Acromyrmex echinatior]								gi|332027430|gb|EGI67513.1| Zinc finger protein jing-like protein [Acromyrmex echinatior]
gi|607365331|gb|EZA59529.1| Sodium-coupled monocarboxylate transporter [Cerapachys biroi]								gi|607361944|gb|EZA56205.1| Trypsin-1 [Cerapachys biroi]
gi|307214472|gb|EFN89509.1| hypothetical protein EAI_01741 [Harpegnathos saltator]								gi|322787067|gb|EFZ13291.1| hypothetical protein SINV_14462 [Solenopsis invicta]
								gi|576938482|dbj|BAO48212.1| Kazal-type proteinase inhibitor [Camponotus japonicus]

## Sheet: pila-curvi
36 elements included exclusively in "T.pila":								66 elements included exclusively in "T.curvi":							2 common elements in "T.pila" and "T.curvi":
gi|607362625|gb|EZA56872.1| Dual oxidase [Cerapachys biroi]								gi|322798669|gb|EFZ20273.1| hypothetical protein SINV_16002 [Solenopsis invicta]							gi|332022486|gb|EGI62793.1| Paired amphipathic helix protein Sin3a [Acromyrmex echinatior]
gi|332027316|gb|EGI67400.1| Putative inorganic phosphate cotransporter [Acromyrmex echinatior]								gi|322792674|gb|EFZ16548.1| hypothetical protein SINV_12348 [Solenopsis invicta]							gi|571510716|ref|XP_006571795.1| PREDICTED: nucleolysin TIA-1 isoform p40-like isoform X1 [Apis mellifera] >gi|571510720|ref|XP_006571796.1| PREDICTED: nucleolysin TIA-1 isoform p40-like isoform X2 [Apis mellifera] >gi|571510723|ref|XP_006571797.1| PREDICTED: nucleolysin TIA-1 isoform p40-like isoform X3 [Apis mellifera] >gi|571510727|ref|XP_006571798.1| PREDICTED: nucleolysin TIA-1 isoform p40-l…
gi|332019530|gb|EGI60009.1| Protein FAM38B [Acromyrmex echinatior]								gi|332029741|gb|EGI69610.1| hypothetical protein G5I_01515 [Acromyrmex echinatior]
gi|571531898|ref|XP_006570278.1| PREDICTED: broad-complex core protein isoforms 1/2/3/4/5 isoform X4 [Apis mellifera]								gi|332027647|gb|EGI67715.1| Autophagy-related protein 2-like protein B [Acromyrmex echinatior]
gi|607354125|gb|EZA48788.1| Voltage-dependent T-type calcium channel subunit alpha-1G, partial [Cerapachys biroi]								gi|332016543|gb|EGI57424.1| SEC14 domain and spectrin repeat-containing protein 1 [Acromyrmex echinatior]
gi|332019684|gb|EGI60158.1| Dual specificity mitogen-activated protein kinase kinase 7 [Acromyrmex echinatior]								gi|307179768|gb|EFN67958.1| RB1-inducible coiled-coil protein 1 [Camponotus floridanus]
gi|307195629|gb|EFN77471.1| Cytosolic purine 5'-nucleotidase [Harpegnathos saltator]								gi|332018906|gb|EGI59452.1| hypothetical protein G5I_12358 [Acromyrmex echinatior]
gi|607365914|gb|EZA60090.1| Zinc transporter ZIP1 [Cerapachys biroi]								gi|322786168|gb|EFZ12773.1| hypothetical protein SINV_02726 [Solenopsis invicta]
gi|332019506|gb|EGI59985.1| Ankyrin repeat and death domain-containing protein 1A [Acromyrmex echinatior]								gi|607358496|gb|EZA52898.1| Epidermal growth factor receptor substrate 15-like protein [Cerapachys biroi]
gi|332016885|gb|EGI57694.1| Uncharacterized protein [Acromyrmex echinatior]								gi|607356846|gb|EZA51338.1| Twinfilin [Cerapachys biroi]
gi|322785879|gb|EFZ12498.1| hypothetical protein SINV_12415 [Solenopsis invicta]								gi|607365268|gb|EZA59466.1| Phosphofurin acidic cluster sorting protein [Cerapachys biroi]
gi|332028062|gb|EGI68113.1| UPF0407 protein [Acromyrmex echinatior]								gi|607360805|gb|EZA55124.1| Unc-13-like protein D [Cerapachys biroi]
gi|350411953|ref|XP_003489499.1| PREDICTED: contactin-5-like [Bombus impatiens]								gi|380012403|ref|XP_003690273.1| PREDICTED: ammonium transporter Rh type B-like [Apis florea]
gi|332023053|gb|EGI63318.1| Growth inhibition and differentiation-related protein 88-like protein [Acromyrmex echinatior]								gi|444245669|gb|AGD94516.1| clock, partial [Solenopsis invicta]
gi|332019568|gb|EGI60047.1| RanBP-type and C3HC4-type zinc finger-containing protein 1 [Acromyrmex echinatior]								gi|322797003|gb|EFZ19317.1| hypothetical protein SINV_02136 [Solenopsis invicta]
gi|332027679|gb|EGI67747.1| Protein trachealess [Acromyrmex echinatior]								gi|322801504|gb|EFZ22165.1| hypothetical protein SINV_12318 [Solenopsis invicta]
gi|350425234|ref|XP_003494055.1| PREDICTED: hypothetical protein LOC100742880 [Bombus impatiens]								gi|332021032|gb|EGI61421.1| Protein still life, isoforms C/SIF type 2 [Acromyrmex echinatior]
gi|332023388|gb|EGI63633.1| Neither inactivation nor afterpotential protein G [Acromyrmex echinatior]								gi|307173760|gb|EFN64547.1| Cytoplasmic aconitate hydratase [Camponotus floridanus]
gi|322801386|gb|EFZ22047.1| hypothetical protein SINV_02116 [Solenopsis invicta]								gi|307175251|gb|EFN65297.1| Cystinosin-like protein [Camponotus floridanus]
gi|332022366|gb|EGI62678.1| Engulfment and cell motility protein 1 [Acromyrmex echinatior]								gi|332017886|gb|EGI58546.1| Chromodomain Y-like protein 2 [Acromyrmex echinatior]
gi|322785436|gb|EFZ12107.1| hypothetical protein SINV_00022 [Solenopsis invicta]								gi|322795622|gb|EFZ18301.1| hypothetical protein SINV_01869 [Solenopsis invicta]
gi|322790012|gb|EFZ15088.1| hypothetical protein SINV_09653 [Solenopsis invicta]								gi|519666758|tpg|DAA64515.1| TPA_inf: venus kinase receptor [Pogonomyrmex barbatus]
gi|607355002|gb|EZA49598.1| T-complex protein 1 subunit eta [Cerapachys biroi]								gi|322794007|gb|EFZ17245.1| hypothetical protein SINV_09516 [Solenopsis invicta]
gi|322802694|gb|EFZ22918.1| hypothetical protein SINV_06801 [Solenopsis invicta]								gi|332019667|gb|EGI60141.1| General transcription factor IIH subunit 3 [Acromyrmex echinatior]
gi|340715053|ref|XP_003396035.1| PREDICTED: hypothetical protein LOC100648747 [Bombus terrestris]								gi|607367043|gb|EZA61199.1| Pre-mRNA-processing factor 40-like protein A [Cerapachys biroi]
gi|607364324|gb|EZA58536.1| Protein lap4 [Cerapachys biroi]								gi|322783670|gb|EFZ11008.1| hypothetical protein SINV_08350 [Solenopsis invicta]
gi|307168569|gb|EFN61627.1| Kelch-like protein 10 [Camponotus floridanus]								gi|322795322|gb|EFZ18127.1| hypothetical protein SINV_11879 [Solenopsis invicta]
gi|572271079|ref|XP_006613517.1| PREDICTED: alkaline phosphatase, tissue-nonspecific isozyme-like [Apis dorsata]								gi|307172990|gb|EFN64132.1| CREB-binding protein [Camponotus floridanus]
gi|332023056|gb|EGI63321.1| hypothetical protein G5I_08350 [Acromyrmex echinatior]								gi|307186408|gb|EFN72042.1| hypothetical protein EAG_13994 [Camponotus floridanus]
gi|607357636|gb|EZA52082.1| Harmonin [Cerapachys biroi]								gi|307185951|gb|EFN71753.1| Abhydrolase domain-containing protein 13 [Camponotus floridanus]
gi|332029549|gb|EGI69438.1| Nephrin [Acromyrmex echinatior]								gi|332018338|gb|EGI58943.1| TBC1 domain family member 24 [Acromyrmex echinatior]
gi|607353434|gb|EZA48197.1| Liprin-beta-1 [Cerapachys biroi]								gi|322799194|gb|EFZ20624.1| hypothetical protein SINV_11906 [Solenopsis invicta]
gi|307184467|gb|EFN70870.1| Fatty acyl-CoA reductase 1 [Camponotus floridanus]								gi|322799119|gb|EFZ20566.1| hypothetical protein SINV_00071 [Solenopsis invicta]
gi|332018110|gb|EGI58724.1| Mushroom body large-type Kenyon cell-specific protein 1 [Acromyrmex echinatior]								gi|307179430|gb|EFN67754.1| Hermansky-Pudlak syndrome 5 protein-like protein [Camponotus floridanus]
gi|607365331|gb|EZA59529.1| Sodium-coupled monocarboxylate transporter [Cerapachys biroi]								gi|332024010|gb|EGI64228.1| Zinc finger protein 778 [Acromyrmex echinatior]
gi|307214472|gb|EFN89509.1| hypothetical protein EAI_01741 [Harpegnathos saltator]								gi|340715358|ref|XP_003396182.1| PREDICTED: hypothetical protein LOC100647097 [Bombus terrestris]
								gi|332024905|gb|EGI65093.1| DE-cadherin [Acromyrmex echinatior]
								gi|332018423|gb|EGI59017.1| Sodium-coupled monocarboxylate transporter 1 [Acromyrmex echinatior]
								gi|307208674|gb|EFN85964.1| Wiskott-Aldrich syndrome protein [Harpegnathos saltator]
								gi|332023237|gb|EGI63493.1| High affinity cAMP-specific 3',5'-cyclic phosphodiesterase 7A [Acromyrmex echinatior]
								gi|322778870|gb|EFZ09286.1| hypothetical protein SINV_11625 [Solenopsis invicta]
								gi|332022835|gb|EGI63108.1| Nucleosome assembly protein 1-like 4 [Acromyrmex echinatior]
								gi|322785457|gb|EFZ12128.1| hypothetical protein SINV_09686 [Solenopsis invicta]
								gi|380014686|ref|XP_003691353.1| PREDICTED: RNA-binding protein Musashi homolog Rbp6-like [Apis florea]
								gi|307183191|gb|EFN70100.1| Ankyrin repeat domain-containing protein 13C [Camponotus floridanus]
								gi|332025441|gb|EGI65606.1| Tachykinin [Acromyrmex echinatior]
								gi|307191980|gb|EFN75370.1| NIK- and IKBKB-binding protein [Harpegnathos saltator]
								gi|332031079|gb|EGI70665.1| UBX domain-containing protein 1 [Acromyrmex echinatior]
								gi|607355919|gb|EZA50467.1| Serine/threonine-protein kinase N2 [Cerapachys biroi]
								gi|607353858|gb|EZA48553.1| Cyclic AMP-dependent transcription factor ATF-2 [Cerapachys biroi]
								gi|322797501|gb|EFZ19556.1| hypothetical protein SINV_13516 [Solenopsis invicta]
								gi|607359664|gb|EZA54017.1| Serine/threonine-protein kinase TAO1 [Cerapachys biroi]
								gi|332030058|gb|EGI69883.1| Heparan sulfate 2-O-sulfotransferase 1 [Acromyrmex echinatior]
								gi|307168873|gb|EFN61797.1| PAP-associated domain-containing protein 5 [Camponotus floridanus]
								gi|665807802|ref|XP_008552196.1| PREDICTED: homeobox protein Nkx-2.4-like [Microplitis demolitor]
								gi|307206688|gb|EFN84643.1| Transmembrane protein 53 [Harpegnathos saltator]
								gi|332026251|gb|EGI66390.1| Inner nuclear membrane protein Man1 [Acromyrmex echinatior]
								gi|607360775|gb|EZA55096.1| hypothetical protein X777_05351, partial [Cerapachys biroi]
								gi|307184874|gb|EFN71152.1| Trypsin-7 [Camponotus floridanus]
								gi|332022276|gb|EGI62589.1| Proteasomal ubiquitin receptor ADRM1-like protein [Acromyrmex echinatior]
								gi|307172194|gb|EFN63719.1| Suppressor of tumorigenicity protein 14 [Camponotus floridanus]
								gi|607358425|gb|EZA52832.1| DNA repair and recombination protein RAD54B, partial [Cerapachys biroi]
								gi|350427767|ref|XP_003494874.1| PREDICTED: latrophilin Cirl-like isoform 1 [Bombus impatiens]
								gi|607355449|gb|EZA50029.1| Plancitoxin-1 [Cerapachys biroi]
								gi|322794483|gb|EFZ17536.1| hypothetical protein SINV_00075 [Solenopsis invicta]
								gi|332020610|gb|EGI61018.1| Lipid storage droplets surface-binding protein 2 [Acromyrmex echinatior]
